# Supplementary material for: Genetically engineered mice for combinatorial cardiovascular optobiology
Source: eLife. 2021 Oct 29;10:e67858. doi: 10.7554/eLife.67858 (PMC8555989; doi:10.7554/eLife.67858)
Supplement: Figure 2—source data 1. [file elife-67858-fig2-data1.csv]

Unstimulated	Stimulated
13.262290	12.715620
9.847352	9.658932
9.876286	9.428836
8.735142	8.320041
9.878679	11.586530
9.736360	10.453610
13.326500	8.711290
9.151341	9.187939
12.804950	11.257240
8.834174	10.909410
7.666088	14.435600
8.856043	11.802740
9.458626	12.081380
9.222486	10.975730
14.356000	10.214930
8.716532	10.208220
13.181680	13.814440
7.513216	11.071920
9.303757	10.551780
8.926602	12.184670
10.221140	10.253620
11.925750	15.282810
7.632575	11.395070
11.575600	12.175070
7.280812	11.367140
14.083930	13.433110
11.115140	11.033550
11.896080	13.373540
7.554136	12.549850
18.487520	12.179220
10.100980	10.788480
7.627555	12.882720
9.590034	10.338720
17.697250	12.423260
15.501410	11.568860
9.908217	12.762970
14.634410	15.792700
8.463463	11.401820
11.826000	11.372050
12.882380	10.831880
13.467010	19.080340
10.612630	11.172740
12.542920	13.960200
10.063330	12.634980
11.981630	11.238400
11.230420	13.990970
13.269120	11.198030
19.114530	12.610370
8.456324	15.357300
8.897612	13.930580
8.679655	14.311290
8.502818	11.394820
9.353626	13.368500
15.187790	13.929640
18.570490	12.151470
8.807908	13.281840
11.063180	10.910730
8.834720	11.549130
7.531579	10.988710
16.373780	13.057700
8.113195	12.663030
8.250429	10.236400
12.224870	11.289770
10.564200	14.178170
8.976699	12.649620
9.400452	11.825270
8.748935	11.057670
8.255347	13.392690
16.129290	10.795040
7.525691	11.343650
14.277840	15.232760
9.843858	11.728350
7.877602	11.402290
7.223372	11.360780
8.231650	10.470540
9.436230	11.217760
8.046757	11.476350
8.745340	11.459550
11.998540	11.034290
13.184600	12.146650
10.394390	11.375050
10.916010	13.238910
11.293530	12.290660
10.111840	10.727710
8.956303	13.605720
14.852800	10.763920
12.729770	12.173210
14.788400	10.614540
8.001554	15.487580
10.024840	11.400250
16.609680	11.022770
7.261769	19.614840
9.052041	12.739890
9.515677	12.586840
12.429440	11.195940
13.610880	12.442790
9.670924	12.109750
8.636130	12.357390
8.377397	12.332420
13.061550
8.778434
7.453360
7.337105
11.726000
12.383060
8.947026
14.122370
7.864411
10.671650
7.719206
7.652137
7.607362
12.112490
13.062310
8.061101
