# Supplementary material for: Genetically engineered mice for combinatorial cardiovascular optobiology
Source: eLife. 2021 Oct 29;10:e67858. doi: 10.7554/eLife.67858 (PMC8555989; doi:10.7554/eLife.67858)
Supplement: Figure 2—source data 3. [file elife-67858-fig2-data3.csv]

Time	Laser	Intensity
0	0	1292.93
0.0235	0	1260.214
0.0469	0	1226.648
0.0704	0	1195.567
0.0938	0	1164.76
0.1173	0	1137.286
0.1407	0	1214.222
0.1642	0	1650.116
0.1876	0	1780.294
0.2111	0	1821.403
0.2345	0	1832.662
0.258	0	1798.354
0.2814	0	1744.744
0.3049	0	1696.529
0.3283	0	1646.573
0.3518	0	1585.736
0.3752	0	1533.22
0.3987	0	1485.04
0.4221	1832.66	1564.616
0.4456	1832.66	1515.467
0.469	1832.66	1473.516
0.4925	0	1307.186
0.5159	0	1273.716
0.5394	0	1235.381
0.5628	0	1204.181
0.5863	0	1170.356
0.6097	0	1144.788
0.6332	0	1127.504
0.6566	0	1576.236
0.6801	0	1743.079
0.7035	0	1791.01
0.727	0	1801.632
0.7504	0	1781.073
0.7739	0	1736.161
0.7973	0	1685.379
0.8208	0	1628.182
0.8442	0	1577.982
0.8677	0	1519.208
0.8911	0	1468.433
0.9146	0	1425.501
0.938	1832.66	1515.887
0.9615	1832.66	1459.74
0.9849	1832.66	1416.28
1.0084	0	1257.23
1.0318	0	1227.33
1.0553	0	1194.482
1.0787	0	1340.281
1.1022	0	1671.17
1.1256	0	1760.867
1.149	0	1793.078
1.1725	0	1766.529
1.196	0	1728.312
1.2194	0	1684.002
1.2429	0	1631.112
1.2663	0	1575.572
1.2898	0	1527.189
1.3132	0	1470.586
1.3367	0	1425.5
1.3601	0	1380.851
1.3836	0	1333.597
1.407	0	1293.051
1.4305	1832.66	1380.902
1.4539	1832.66	1340.589
1.4774	1832.66	1310.987
1.5008	0	1415.182
1.5243	0	1685.372
1.5477	0	1768.578
1.5712	0	1782.973
1.5946	0	1757.671
1.6181	0	1709.86
1.6415	0	1670.996
1.665	0	1614.753
1.6884	0	1565.5
1.7119	0	1511.131
1.7353	0	1460.856
1.7588	0	1406.714
1.7822	0	1370.999
1.8057	0	1325.147
1.8291	0	1282.812
1.8526	0	1242.834
1.876	0	1211.222
1.8995	0	1172.356
1.9229	1832.66	1252.108
1.9464	1832.66	1221.398
1.9698	1832.66	1206.627
1.9933	0	1238.066
2.0167	0	1635.442
2.0402	0	1751.036
2.0636	0	1786.646
2.0871	0	1785.786
2.1105	0	1751.746
2.134	0	1712.011
2.1574	0	1660.343
2.1809	0	1603.63
2.2043	0	1553.159
2.2278	0	1498.82
2.2512	0	1446.448
2.2746	0	1400.673
2.2981	0	1359.143
2.3215	0	1318.024
2.345	0	1279.902
2.3685	0	1239.633
2.3919	0	1208.028
2.4154	0	1171.512
2.4388	1832.66	1252.667
2.4623	1832.66	1225.291
2.4857	1832.66	1184.882
2.5092	0	1063.077
2.5326	0	1037.67
2.5561	0	1014.828
2.5795	0	995.952
2.603	0	979.852
2.6264	0	978.327
2.6499	0	1504.751
2.6733	0	1694.064
2.6968	0	1760.444
2.7202	0	1786.443
2.7437	0	1777.413
2.7671	0	1737.344
2.7906	0	1694.873
2.814	0	1640.238
2.8375	0	1589.264
2.8609	0	1532.28
2.8844	0	1484.948
2.9078	0	1438.618
2.9313	1832.66	1527.553
2.9547	1832.66	1471.392
2.9782	1832.66	1429.209
3.0016	0	1265.336
3.0251	0	1228.553
3.0485	0	1187.902
3.072	0	1158.699
3.0954	0	1126.792
3.1189	0	1101.36
3.1423	0	1306.034
3.1658	0	1617.448
3.1892	0	1702.766
3.2127	0	1730.182
3.2361	0	1719.48
3.2596	0	1680.612
3.283	0	1638.984
3.3065	0	1590.841
3.3299	0	1533.556
3.3534	0	1478.156
3.3768	0	1433.318
3.4003	0	1395.498
3.4237	1832.66	1469.787
3.4472	1832.66	1412.483
3.4706	1832.66	1389.648
3.4941	0	1231.497
3.5175	0	1194.536
3.541	0	1160.666
3.5644	0	1125.662
3.5879	0	1104.252
3.6113	0	1073.864
3.6348	0	1296.82
3.6582	0	1616.476
3.6817	0	1718.563
3.7051	0	1748.373
3.7286	0	1728.08
3.752	0	1703.178
3.7755	0	1659.133
3.7989	0	1610.061
3.8224	0	1558.256
3.8458	0	1505.043
3.8693	0	1453.986
3.8927	0	1407.86
3.9162	0	1372.663
3.9396	1832.66	1443
3.9631	1832.66	1399.469
3.9865	1832.66	1323.354
4.01	0	1205.203
4.0334	0	1169.858
4.0569	0	1142.052
4.0803	0	1109.016
4.1038	0	1087.328
4.1272	0	1101.916
4.1507	0	1537.046
4.1741	0	1674.814
4.1975	0	1707.631
4.221	0	1711.411
4.2444	0	1679.434
4.2679	0	1642.752
4.2914	0	1592.286
4.3148	0	1542.566
4.3383	0	1491.044
4.3617	0	1442.751
4.3852	0	1398.199
4.4086	0	1351.507
4.4321	1832.66	1426.472
4.4555	1832.66	1388.56
4.479	1832.66	1347.897
4.5024	0	1196.261
4.5259	0	1161.449
4.5493	0	1136.366
4.5728	0	1411.448
4.5962	0	1633.852
4.6197	0	1694.178
4.6431	0	1707.182
4.6666	0	1678.271
4.69	0	1639.403
