# Supplementary material for: Genetically engineered mice for combinatorial cardiovascular optobiology
Source: eLife. 2021 Oct 29;10:e67858. doi: 10.7554/eLife.67858 (PMC8555989; doi:10.7554/eLife.67858)
Supplement: Figure 7—figure supplement 1—source data 1. [file elife-67858-fig7-figsupp1-data1.csv]

Time	Laser	OptoA1AR	Control
0	0	-0.042446538	-0.181553077
0.0456	0	-0.042446538	-0.181553077
0.0911	0	-0.042446538	-0.181553077
0.1367	0	-0.042446538	-0.181553077
0.1822	0	-0.042446538	-0.181553077
0.2278	0	-0.042446538	-0.181553077
0.2734	0	-0.042446538	-0.181553077
0.3189	0	-0.042446538	-0.181553077
0.3645	0	-0.042446538	-0.181553077
0.41	0	-0.042446538	-0.181553077
0.4556	0	-0.042446538	-0.181553077
0.5012	0	-0.042446538	-0.181553077
0.5467	0	-0.042446538	-0.181553077
0.5923	0	-0.042446538	-0.181553077
0.6378	0	-0.042446538	-0.181553077
0.6834	0	-0.042446538	-0.181553077
0.729	0	-0.042446538	-0.181553077
0.7745	0	-0.042446538	-0.181553077
0.8201	0	-0.042446538	-0.181553077
0.8656	0	-0.042446538	-0.181553077
0.9112	0	-0.042446538	-0.181553077
0.9568	0	-0.042446538	-0.181553077
1.0023	0	-0.042446538	-0.181553077
1.0479	0	-0.042446538	-0.181553077
1.0934	0	-0.042446538	-0.181553077
1.139	0	-0.042446538	-0.181553077
1.1845	0	-0.042446538	-0.181553077
1.2301	0	-0.042446538	-0.181553077
1.2757	0	-0.042446538	-0.181553077
1.3212	0	-0.042446538	-0.181553077
1.3668	0	-0.042446538	-0.181553077
1.4123	0	-0.042446538	-0.181553077
1.4579	0	-0.042446538	-0.181553077
1.5035	0	-0.042446538	-0.181553077
1.549	0	-0.042446538	-0.181553077
1.5946	0	-0.042446538	-0.181553077
1.6401	0	-0.042446538	-0.181553077
1.6857	0	-0.042446538	-0.181553077
1.7313	0	-0.042446538	-0.181553077
1.7768	0	-0.042446538	-0.181553077
1.8224	0	-0.042446538	-0.181553077
1.8679	0	-0.042446538	-0.181553077
1.9135	0	-0.042446538	-0.181553077
1.9591	0	-0.042446538	-0.181553077
2.0046	0	-0.042446538	-0.181553077
2.0502	0	-0.042446538	-0.181553077
2.0957	0	-0.042446538	-0.181553077
2.1413	0	-0.042446538	-0.181553077
2.1869	0	-0.042446538	-0.181553077
2.2324	0	-0.042446538	-0.181553077
2.278	0	-0.042446538	-0.181553077
2.3235	0	-0.042446538	-0.181553077
2.3691	0	-0.042446538	-0.181553077
2.4147	0	-0.042446538	-0.181553077
2.4602	0	-0.042446538	-0.181553077
2.5058	0	-0.042446538	-0.181553077
2.5513	0	-0.042446538	-0.181553077
2.5969	0	-0.042446538	-0.181553077
2.6425	0	-0.042446538	-0.181553077
2.688	0	-0.042446538	-0.181553077
2.7336	0	-0.042446538	-0.181553077
2.7791	0	-0.042446538	-0.181553077
2.8247	0	-0.042446538	-0.181553077
2.8703	0	-0.042446538	-0.181553077
2.9158	0	-0.042446538	-0.181553077
2.9614	0	-0.042446538	-0.181553077
3.0069	0	-0.042446538	-0.181553077
3.0525	0	-0.042446538	-0.181553077
3.0981	0	-0.042446538	-0.181553077
3.1436	0	-0.042446538	-0.181553077
3.1892	0	-0.042446538	-0.181553077
3.2347	0	-0.042446538	-0.181553077
3.2803	0	-0.042446538	-0.181553077
3.3259	0	-0.042446538	-0.181553077
3.3714	0	-0.042446538	-0.181553077
3.417	0	-0.042446538	-0.181553077
3.4625	0	-0.014651538	-0.186398077
3.5081	0	0.002433462	-0.202463077
3.5536	0	-0.084521538	-0.186398077
3.5992	0	-0.104156538	-0.204248077
3.6448	0	0.008553462	-0.230003077
3.6903	0	0.119733462	-0.232808077
3.7359	0	0.032523462	-0.133358077
3.7814	0	-0.155156538	-0.136928077
3.827	0	-0.053156538	-0.047933077
3.8726	0	-0.074576538	-0.053543077
3.9181	0	-0.027656538	-0.016823077
3.9637	0	-0.049076538	-0.004838077
4.0092	0	0.044253462	0.016326923
4.0548	0	0.022833462	-0.001013077
4.1004	0	0.027678462	0.017856923
4.1459	0	0.076638462	0.000771923
4.1915	0	0.107238462	-0.018098077
4.237	0	0.077913462	0.006126923
4.2826	0	0.053943462	-0.002288077
4.3282	0	0.125088462	0.001536923
4.3737	0	0.066438462	0.009696923
4.4193	0	0.187818462	0.014031923
4.4648	0	0.179148462	0.022956923
4.5104	0	0.115653462	0.017091923
4.556	0	0.130443462	0.010716923
4.6015	0	0.015948462	0.011991923
4.6471	0	-0.045251538	0.005871923
4.6926	0	0.008808462	0.028821923
4.7382	0	-0.004451538	0.027546923
4.7838	0	-0.041171538	0.031116923
4.8293	0	-0.050606538	0.055086923
4.8749	0	-0.117926538	0.056361923
4.9204	0	-0.090131538	0.019641923
4.966	0	-0.111551538	0.053301923
5.0116	0	-0.099821538	0.093591923
5.0571	0	0.011358462	0.122916923
5.1027	0	0.028188462	0.122406923
5.1482	0	0.096273462	0.103791923
5.1938	0	0.070518462	0.240726923
5.2394	0	0.033798462	0.218286923
5.2849	0	0.100863462	0.199161923
5.3305	0	0.117183462	0.218286923
5.376	0	0.047568462	0.261891923
5.4216	0	0.057513462	0.273366923
5.4672	0	0.046803462	0.231036923
5.5127	0	0.050883462	0.212676923
5.5583	0	-0.024086538	0.249906923
5.6038	0	0.013398462	0.255516923
5.6494	0	0.072303462	0.209871923
5.695	0	0.095253462	0.215481923
5.7405	0	0.132993462	0.214461923
5.7861	0	0.035073462	0.206556923
5.8316	0	0.011103462	0.305241923
5.8772	0	-0.033776538	0.235371923
5.9227	0	0.080463462	0.197886923
5.9683	0	0.052158462	0.171111923
6.0139	0	0.063633462	0.243786923
6.0594	0	0.048843462	0.202476923
6.105	0	0.061593462	0.230016923
6.1505	0	0.055218462	0.252711923
6.1961	0	0.051903462	0.176721923
6.2417	0	0.038898462	0.150456923
6.2872	0	0.044763462	0.102006923
6.3328	0	-0.013631538	0.070386923
6.3783	0	0.125343462	0.066561923
6.4239	0	0.111063462	0.078291923
6.4695	0	0.138603462	0.107361923
6.515	0	0.129933462	0.106596923
6.5606	0	0.138093462	0.200946923
6.6061	0	0.119223462	0.260616923
6.6517	0	0.018243462	0.241746923
6.6973	0	-0.085286538	0.247866923
6.7428	0	-0.171476538	0.269796923
6.7884	0	-0.256901538	0.275406923
6.8339	0	-0.272711538	0.282546923
6.8795	0	-0.345131538	0.367206923
6.9251	0	-0.267101538	0.371796923
6.9706	0	-0.130421538	0.379956923
7.0162	0	-0.107216538	0.379191923
7.0617	0	-0.075851538	0.373071923
7.1073	0	0.059298462	0.393726923
7.1529	0	0.094998462	0.325896923
7.1984	0	0.135798462	0.343236923
7.244	0	0.192918462	0.330486923
7.2895	0	0.201333462	0.333291923
7.3351	0	0.097548462	0.266736923
7.3807	0	0.235503462	0.182331923
7.4262	0	0.326793462	0.171876923
7.4718	0	0.330873462	0.183096923
7.5173	0	0.349233462	0.182586923
7.5629	0	0.331128462	0.152496923
7.6085	0	0.386463462	0.153006923
7.654	0	0.309453462	0.135156923
7.6996	0	0.369633462	0.135666923
7.7451	0	0.295428462	0.120621923
7.7907	0	0.284973462	0.131076923
7.8363	0	0.283443462	0.165501923
7.8818	0	0.311748462	0.170601923
7.9274	0	0.165378462	0.128016923
7.9729	0	0.216378462	0.153261923
8.0185	0	0.243408462	0.146376923
8.0641	0	0.196998462	0.174681923
8.1096	0	0.203373462	0.164226923
8.1552	0	0.230403462	0.192021923
8.2007	0	0.113103462	0.195336923
8.2463	0	0.079698462	0.191001923
8.2918	0	0.051138462	0.176466923
8.3374	0	-0.034286538	0.164226923
8.383	0	-0.036071538	0.182076923
8.4285	0	-0.001646538	0.179271923
8.4741	0	0.013908462	0.168306923
8.5196	0	0.082248462	0.182841923
8.5652	0	0.192408462	0.129291923
8.6108	0	0.216888462	0.106341923
8.6563	0	0.122793462	0.046926923
8.7019	0	-0.008276538	0.067071923
8.7474	0	-0.018986538	0.060696923
8.793	0	-0.026126538	0.035196923
8.8386	0	-0.016436538	0.042336923
8.8841	0	0.003198462	0.030096923
8.9297	0	-0.097271538	-0.003308077
8.9752	0	-0.059021538	-0.033398077
9.0208	0	-0.033011538	-0.040283077
9.0664	0	0.054963462	-0.023453077
9.1119	0	0.090408462	-0.001013077
9.1575	0	0.091938462	-0.008918077
9.203	0	0.110043462	-0.011978077
9.2486	0	0.103413462	-0.015293077
9.2942	0	-0.070496538	-0.039263077
9.3397	0	0.013143462	-0.006113077
9.3853	0	-0.122516538	-0.009938077
9.4308	0	-0.079421538	-0.064253077
9.4764	0	-0.083501538	-0.066803077
9.522	0	-0.104921538	-0.107093077
9.5675	0	-0.124046538	-0.114488077
9.6131	0	-0.212021538	-0.106583077
9.6586	0	-0.311981538	-0.095618077
9.7042	0	-0.334166538	-0.070118077
9.7498	0	-0.335186538	-0.074963077
9.7953	0	-0.339521538	-0.070373077
9.8409	0	-0.359666538	-0.069608077
9.8864	0	-0.416786538	-0.083633077
9.932	0	-0.530261538	-0.156053077
9.9776	0	-0.490481538	-0.248618077
10.0231	1	-0.514451538	-0.221078077
10.0687	1	-0.515981538	-0.254228077
10.1142	1	-0.541736538	-0.231533077
10.1598	1	-0.518531538	-0.227453077
10.2054	1	-0.574886538	-0.298088077
10.2509	1	-0.483341538	-0.318488077
10.2965	1	-0.471611538	-0.321038077
10.342	1	-0.565451538	-0.308543077
10.3876	1	-0.552191538	-0.325883077
10.4331	1	-0.513941538	-0.322058077
10.4787	1	-0.525161538	-0.269273077
10.5243	1	-0.593756538	-0.257798077
10.5698	1	-0.566471538	-0.346793077
10.6154	1	-0.480536538	-0.359288077
10.6609	1	-0.508331538	-0.466898077
10.7065	1	-0.484871538	-0.485513077
10.7521	1	-0.505781538	-0.501323077
10.7976	1	-0.494561538	-0.502853077
10.8432	1	-0.582536538	-0.500558077
10.8887	1	-0.590441538	-0.502343077
10.9343	1	-0.475436538	-0.521978077
10.9799	1	-0.439736538	-0.533963077
11.0254	1	-0.443816538	-0.504638077
11.071	1	-0.393071538	-0.441908077
11.1165	1	-0.359156538	-0.363113077
11.1621	1	-0.409391538	-0.352913077
11.2077	1	-0.369611538	-0.380198077
11.2532	1	-0.368591538	-0.399578077
11.2988	1	-0.345896538	-0.424313077
11.3443	1	-0.275261538	-0.436043077
11.3899	1	-0.251546538	-0.437318077
11.4355	1	-0.233441538	-0.428138077
11.481	1	-0.153881538	-0.424058077
11.5266	1	-0.191876538	-0.451343077
11.5721	1	-0.115121538	-0.499283077
11.6177	1	-0.135266538	-0.500048077
11.6633	1	-0.138326538	-0.535748077
11.7088	1	-0.125321538	-0.526568077
11.7544	1	-0.123536538	-0.517643077
11.7999	1	-0.109766538	-0.538298077
11.8455	1	-0.057491538	-0.579608077
11.8911	1	-0.276791538	-0.598478077
11.9366	1	-0.193151538	-0.615818077
11.9822	1	-0.216866538	-0.615563077
12.0277	1	-0.085541538	-0.681608077
12.0733	1	-0.092171538	-0.679823077
12.1189	1	0.031248462	-0.670643077
12.1644	1	0.074088462	-0.667328077
12.21	1	0.157983462	-0.733883077
12.2555	1	0.166653462	-0.755303077
12.3011	1	0.170223462	-0.770603077
12.3467	1	0.231933462	-0.817268077
12.3922	1	0.253863462	-0.845063077
12.4378	1	0.348213462	-0.855518077
12.4833	1	0.323223462	-0.824663077
12.5289	1	0.210513462	-0.798398077
12.5745	1	0.300528462	-0.792023077
12.62	1	0.296958462	-0.775193077
12.6656	1	0.327558462	-0.856538077
12.7111	1	0.329343462	-0.847358077
12.7567	1	0.235503462	-0.849398077
12.8022	1	0.283953462	-0.791768077
12.8478	1	0.268653462	-0.853988077
12.8934	1	0.265848462	-0.853478077
12.9389	1	0.321183462	-0.869798077
12.9845	1	0.410433462	-0.896063077
13.03	1	0.366573462	-0.890708077
13.0756	1	0.332913462	-0.884843077
13.1212	1	0.306393462	-0.857048077
13.1667	1	0.348978462	-0.855773077
13.2123	1	0.310218462	-0.810383077
13.2578	1	0.313023462	-0.809618077
13.3034	1	0.303588462	-0.808088077
13.349	1	0.359943462	-0.787433077
13.3945	1	0.357138462	-0.860363077
13.4401	1	0.389778462	-0.868523077
13.4856	1	0.488208462	-0.881783077
13.5312	1	0.532323462	-0.875153077
13.5768	1	0.611628462	-0.902438077
13.6223	1	0.721533462	-0.928958077
13.6679	1	0.682773462	-0.912383077
13.7134	1	0.683793462	-0.978173077
13.759	1	0.582813462	-0.997298077
13.8046	1	0.555018462	-1.004948077
13.8501	1	0.586383462	-1.002143077
13.8957	1	0.615198462	-1.003418077
13.9412	1	0.526713462	-1.018208077
13.9868	1	0.438738462	-1.043708077
14.0324	1	0.395898462	-1.074818077
14.0779	1	0.363513462	-1.093943077
14.1235	1	0.410943462	-1.101593077
14.169	1	0.571338462	-1.099298077
14.2146	1	0.542268462	-1.097768077
14.2602	1	0.538953462	-1.110263077
14.3057	1	0.565218462	-1.085273077
14.3513	1	0.546348462	-1.069463077
14.3968	1	0.563688462	-1.052123077
14.4424	1	0.517278462	-1.013363077
14.488	1	0.613923462	-1.002398077
14.5335	1	0.576948462	-0.991178077
14.5791	1	0.700623462	-0.953438077
14.6246	1	0.793953462	-0.968738077
14.6702	1	0.792168462	-1.028408077
14.7158	1	0.686598462	-1.031213077
14.7613	1	0.742698462	-1.020503077
14.8069	1	0.641973462	-1.041923077
14.8524	1	0.596583462	-1.049828077
14.898	1	0.517788462	-1.088843077
14.9436	1	0.519318462	-1.038098077
14.9891	1	0.480813462	-1.029173077
15.0347	1	0.584598462	-1.039628077
15.0802	1	0.661863462	-1.007753077
15.1258	1	0.764373462	-1.028153077
15.1713	1	0.828378462	-1.080428077
15.2169	1	0.838323462	-1.057478077
15.2625	1	0.760548462	-1.050848077
15.308	1	0.734538462	-1.062833077
15.3536	1	0.784263462	-1.050848077
15.3991	1	0.729183462	-1.017188077
15.4447	1	0.755193462	-0.983018077
15.4903	1	0.863313462	-0.960068077
15.5358	1	0.948738462	-0.956243077
15.5814	1	1.081083462	-0.943238077
15.6269	1	1.164723462	-0.909578077
15.6725	1	1.309563462	-0.933293077
15.7181	1	1.202718462	-0.926153077
15.7636	1	1.218528462	-0.918248077
15.8092	1	1.213683462	-0.915188077
15.8547	1	1.197618462	-0.876938077
15.9003	1	1.229493462	-0.886628077
15.9459	1	1.284318462	-0.871328077
15.9914	1	1.285338462	-0.865208077
16.037	1	1.305228462	-0.864953077
16.0825	1	1.333278462	-0.819563077
16.1281	1	1.426098462	-0.792788077
16.1737	1	1.548753462	-0.828998077
16.2192	1	1.682883462	-0.776213077
16.2648	1	1.677528462	-0.759893077
16.3103	1	1.759893462	-0.749438077
16.3559	1	1.863168462	-0.732098077
16.4015	1	1.914168462	-0.712208077
16.447	1	1.926153462	-0.775958077
16.4926	1	2.132448462	-0.738983077
16.5381	1	2.310948462	-0.746123077
16.5837	1	2.443803462	-0.758873077
16.6293	1	2.461398462	-0.758108077
16.6748	1	2.525403462	-0.747653077
16.7204	1	2.685033462	-0.756578077
16.7659	1	2.715633462	-0.755558077
16.8115	1	2.665398462	-0.761423077
16.8571	1	2.793918462	-0.768053077
16.9026	1	2.907648462	-0.758873077
16.9482	1	2.939013462	-0.766013077
16.9937	1	2.831658462	-0.804773077
17.0393	1	2.898468462	-0.790238077
17.0849	1	3.002508462	-0.749693077
17.1304	1	3.043308462	-0.713483077
17.176	1	3.151173462	-0.714758077
17.2215	1	3.213393462	-0.704048077
17.2671	1	3.162138462	-0.698183077
17.3127	1	3.241698462	-0.744083077
17.3582	1	3.234813462	-0.753518077
17.4038	1	3.180753462	-0.770603077
17.4493	1	3.263118462	-0.742553077
17.4949	1	3.283518462	-0.727253077
17.5404	1	3.392913462	-0.721388077
17.586	1	3.404388462	-0.719603077
17.6316	1	3.526023462	-0.772643077
17.6771	1	3.469413462	-0.788453077
17.7227	1	3.476553462	-0.740513077
17.7682	1	3.385773462	-0.738473077
17.8138	1	3.412038462	-0.686453077
17.8594	1	3.451818462	-0.711953077
17.9049	1	3.477318462	-0.807578077
17.9505	1	3.459723462	-0.912383077
17.996	1	3.434733462	-0.923348077
18.0416	1	3.513528462	-0.924623077
18.0872	1	3.430908462	-0.905498077
18.1327	1	3.428103462	-0.892493077
18.1783	1	3.531633462	-0.889943077
18.2238	1	3.634908462	-0.840983077
18.2694	1	3.620373462	-0.835373077
18.315	1	3.473493462	-0.820073077
18.3605	1	3.472728462	-0.811403077
18.4061	1	3.515058462	-0.782843077
18.4516	1	3.557133462	-0.772133077
18.4972	1	3.583143462	-0.743063077
18.5428	1	3.574218462	-0.759638077
18.5883	1	3.678003462	-0.766523077
18.6339	1	3.643068462	-0.787433077
18.6794	1	3.556623462	-0.777998077
18.725	1	3.668313462	-0.742808077
18.7706	1	3.545148462	-0.727253077
18.8161	1	3.545658462	-0.731333077
18.8617	1	3.560193462	-0.746633077
18.9072	1	3.628023462	-0.725978077
18.9528	1	3.628278462	-0.730313077
18.9984	1	3.703248462	-0.761678077
19.0439	1	3.599208462	-0.777743077
19.0895	1	3.656073462	-0.836393077
19.135	1	3.775923462	-0.856283077
19.1806	1	3.853953462	-0.830783077
19.2262	1	3.932748462	-0.795083077
19.2717	1	3.961818462	-0.729803077
19.3173	1	4.047498462	-0.737453077
19.3628	1	4.271643462	-0.772133077
19.4084	1	4.290258462	-0.776723077
19.454	1	4.284138462	-0.777233077
19.4995	1	4.384353462	-0.794063077
19.5451	1	4.508028462	-0.795338077
19.5906	1	4.526898462	-0.800438077
19.6362	1	4.606968462	-0.842258077
19.6818	1	4.692138462	-0.814208077
19.7273	1	4.719423462	-0.787178077
19.7729	1	4.727838462	-0.774938077
19.8184	1	4.611813462	-0.770603077
19.864	1	4.708968462	-0.778763077
19.9095	1	4.789548462	-0.778253077
19.9551	1	4.846413462	-0.796868077
20.0007	1	4.830348462	-0.782333077
20.0462	1	4.801278462	-0.783863077
20.0918	1	4.818108462	-0.799418077
20.1373	1	4.791843462	-0.823388077
20.1829	1	4.875228462	-0.844043077
20.2285	1	4.968558462	-0.852458077
20.274	1	4.959378462	-0.905753077
20.3196	1	4.917813462	-0.890453077
20.3651	1	5.072853462	-0.911873077
20.4107	1	4.971873462	-0.898868077
20.4563	1	4.895373462	-0.924368077
20.5018	1	4.974678462	-0.948083077
20.5474	1	5.119263462	-0.917228077
20.5929	1	5.257473462	-0.874898077
20.6385	1	5.304903462	-0.889688077
20.6841	1	5.282973462	-0.894023077
20.7296	1	5.228148462	-0.867503077
20.7752	1	5.373498462	-0.856283077
20.8207	1	5.450508462	-0.820073077
20.8663	1	5.566533462	-0.816248077
20.9119	1	5.659098462	-0.797633077
20.9574	1	5.736363462	-0.790238077
21.003	1	5.673123462	-0.798143077
21.0485	1	5.677458462	-0.812933077
21.0941	1	5.785833462	-0.809363077
21.1397	1	5.891658462	-0.852458077
21.1852	1	5.945718462	-0.862403077
21.2308	1	6.060978462	-0.883313077
21.2763	1	6.134418462	-0.886883077
21.3219	1	6.155583462	-0.878978077
21.3675	1	6.253248462	-0.872858077
21.413	1	6.234378462	-0.901673077
21.4586	1	6.139518462	-0.868778077
21.5041	1	6.195108462	-0.856028077
21.5497	1	6.218058462	-0.860363077
21.5953	1	6.308583462	-0.876938077
21.6408	1	6.515643462	-0.898103077
21.6864	1	6.471783462	-0.863423077
21.7319	1	6.549813462	-0.806558077
21.7775	1	6.620703462	-0.837668077
21.8231	1	6.740553462	-0.837413077
21.8686	1	6.764778462	-0.840983077
21.9142	1	6.812463462	-0.837923077
21.9597	1	6.849693462	-0.779783077
22.0053	1	6.981018462	-0.753773077
22.0508	1	7.073328462	-0.762953077
22.0964	1	7.229898462	-0.745358077
22.142	1	7.351788462	-0.675233077
22.1875	1	7.376268462	-0.690788077
22.2331	1	7.402278462	-0.745103077
22.2786	1	7.358418462	-0.697163077
22.3242	1	7.330878462	-0.718583077
22.3698	1	7.394373462	-0.747143077
22.4153	1	7.241883462	-0.797123077
22.4609	1	7.252593462	-0.842258077
22.5064	1	7.183488462	-0.819053077
22.552	1	7.247493462	-0.823388077
22.5976	1	7.264833462	-0.817268077
22.6431	1	7.297218462	-0.833333077
22.6887	1	7.435428462	-0.860108077
22.7342	1	7.410183462	-0.855263077
22.7798	1	7.432113462	-0.861893077
22.8254	1	7.529013462	-0.826958077
22.8709	1	7.583328462	-0.801968077
22.9165	1	7.727658462	-0.848633077
22.962	1	7.772283462	-0.848633077
23.0076	1	7.683543462	-0.837413077
23.0532	1	7.625148462	-0.864188077
23.0987	1	7.687878462	-0.889688077
23.1443	1	7.660083462	-0.889943077
23.1898	1	7.735563462	-0.919268077
23.2354	1	7.719243462	-0.919013077
23.281	1	7.810023462	-0.904223077
23.3265	1	7.851843462	-0.884843077
23.3721	1	7.751118462	-0.896828077
23.4176	1	7.755708462	-0.897593077
23.4632	1	7.850568462	-0.860363077
23.5088	1	7.908453462	-0.875153077
23.5543	1	7.822263462	-0.870818077
23.5999	1	7.902078462	-0.865208077
23.6454	1	7.882188462	-0.833333077
23.691	1	7.855413462	-0.859088077
23.7366	1	7.737093462	-0.842258077
23.7821	1	7.808748462	-0.743573077
23.8277	1	7.854138462	-0.751478077
23.8732	1	7.940838462	-0.731078077
23.9188	1	7.926813462	-0.756833077
23.9644	1	8.018358462	-0.773153077
24.0099	1	8.107863462	-0.786923077
24.0555	1	8.034678462	-0.816758077
24.101	1	8.093583462	-0.810893077
24.1466	1	8.129793462	-0.752243077
24.1922	1	8.257548462	-0.761678077
24.2377	1	8.310078462	-0.746123077
24.2833	1	8.329968462	-0.742553077
24.3288	1	8.348583462	-0.720368077
24.3744	1	8.344503462	-0.679568077
24.4199	1	8.451348462	-0.636728077
24.4655	1	8.443443462	-0.587003077
24.5111	1	8.451093462	-0.589043077
24.5566	1	8.504388462	-0.599753077
24.6022	1	8.552328462	-0.575528077
24.6477	1	8.559468462	-0.614543077
24.6933	1	8.556918462	-0.599498077
24.7389	1	8.569158462	-0.573743077
24.7844	1	8.668353462	-0.555383077
24.83	1	8.729298462	-0.558953077
24.8755	1	8.642343462	-0.504893077
24.9211	1	8.802993462	-0.500303077
24.9667	1	8.902188462	-0.500303077
25.0122	1	8.882043462	-0.519428077
25.0578	1	8.868018462	-0.555638077
25.1033	1	8.966448462	-0.586493077
25.1489	1	9.031983462	-0.599498077
25.1945	1	9.124293462	-0.590318077
25.24	1	9.126333462	-0.593123077
25.2856	1	9.172998462	-0.559973077
25.3311	1	9.211248462	-0.565583077
25.3767	1	9.327528462	-0.556148077
25.4223	1	9.311973462	-0.535493077
25.4678	1	9.344358462	-0.521213077
25.5134	1	9.485118462	-0.491123077
25.5589	1	9.576663462	-0.492653077
25.6045	1	9.576918462	-0.492143077
25.6501	1	9.659538462	-0.464858077
25.6956	1	9.521583462	-0.517898077
25.7412	1	9.439473462	-0.484748077
25.7867	1	9.354558462	-0.474293077
25.8323	1	9.288768462	-0.447008077
25.8779	1	9.446613462	-0.409268077
25.9234	1	9.430548462	-0.397793077
25.969	1	9.448398462	-0.364643077
26.0145	1	9.445848462	-0.358013077
26.0601	1	9.387708462	-0.392183077
26.1057	1	9.385413462	-0.377138077
26.1512	1	9.390768462	-0.379433077
26.1968	1	9.355833462	-0.338123077
26.2423	1	9.357108462	-0.309308077
26.2879	1	9.430548462	-0.314918077
26.3335	1	9.424173462	-0.300638077
26.379	1	9.380568462	-0.307778077
26.4246	1	9.408618462	-0.307013077
26.4701	1	9.422133462	-0.352148077
26.5157	1	9.337473462	-0.411563077
26.5613	1	9.468543462	-0.400598077
26.6068	1	9.413463462	-0.351893077
26.6524	1	9.521073462	-0.315428077
26.6979	1	9.506538462	-0.270548077
26.7435	1	9.579723462	-0.258818077
26.789	1	9.664893462	-0.254993077
26.8346	1	9.722523462	-0.281258077
26.8802	1	9.792138462	-0.271568077
26.9257	1	9.908673462	-0.272843077
26.9713	1	10.02010846	-0.265193077
27.0168	1	9.947433462	-0.244793077
27.0624	1	9.874758462	-0.258563077
27.108	1	9.943098462	-0.240458077
27.1535	1	9.935958462	-0.251423077
27.1991	1	9.869148462	-0.270293077
27.2446	1	10.01832346	-0.291203077
27.2902	1	10.11751846	-0.267488077
27.3358	1	10.03030846	-0.276923077
27.3813	1	10.00633846	-0.335573077
27.4269	1	10.04764846	-0.344498077
27.4724	1	10.12236346	-0.324098077
27.518	1	10.21926346	-0.309563077
27.5636	1	10.36410346	-0.344498077
27.6091	1	10.37379346	-0.380198077
27.6547	1	10.42734346	-0.362603077
27.7002	1	10.43754346	-0.301913077
27.7458	1	10.31692846	-0.319763077
27.7914	1	10.21110346	-0.282533077
27.8369	1	10.28403346	-0.289418077
27.8825	1	10.28734846	-0.276413077
27.928	1	10.18330846	-0.299618077
27.9736	1	10.17693346	-0.236888077
28.0192	1	10.22997346	-0.243008077
28.0647	1	10.23150346	-0.243263077
28.1103	1	10.22818846	-0.237398077
28.1558	1	10.23277846	-0.236378077
28.2014	1	10.27918846	-0.237143077
28.247	1	10.29856846	-0.232808077
28.2925	1	10.41076846	-0.239948077
28.3381	1	10.47247846	-0.244283077
28.3836	1	10.57779346	-0.241988077
28.4292	1	10.60966846	-0.252188077
28.4748	1	10.61119846	-0.226688077
28.5203	1	10.69509346	-0.229493077
28.5659	1	10.78995346	-0.265448077
28.6114	1	10.73920846	-0.213938077
28.657	1	10.71727846	-0.197873077
28.7026	1	10.83330346	-0.095618077
28.7481	1	10.73359846	-0.116273077
28.7937	1	10.70274346	-0.137183077
28.8392	1	10.59232846	-0.131318077
28.8848	1	10.51633846	-0.164723077
28.9304	1	10.47706846	-0.190223077
28.9759	1	10.46023846	-0.245303077
29.0215	1	10.46941846	-0.253208077
29.067	1	10.36945846	-0.233573077
29.1126	1	10.37914846	-0.300383077
29.1581	1	10.42045846	-0.273863077
29.2037	1	10.36665346	-0.254228077
29.2493	1	10.46890846	-0.232043077
29.2948	1	10.40439346	-0.190478077
29.3404	1	10.49823346	-0.200168077
29.3859	1	10.56325846	-0.176198077
29.4315	1	10.69942846	-0.158093077
29.4771	1	10.76572846	-0.159623077
29.5226	1	10.71676846	-0.135398077
29.5682	1	10.60966846	-0.150188077
29.6137	1	10.54183846	-0.173138077
29.6593	1	10.45386346	-0.191498077
29.7049	1	10.50613846	-0.203483077
29.7504	1	10.44162346	-0.159368077
29.796	1	10.53903346	-0.107093077
29.8415	1	10.55662846	-0.133613077
29.8871	1	10.61757346	-0.164723077
29.9327	1	10.55484346	-0.158603077
29.9782	1	10.56096346	-0.157838077
30.0238	1	10.43371846	-0.157583077
30.0693	0	10.48242346	-0.150698077
30.1149	0	10.35237346	-0.137693077
30.1605	0	10.22028346	-0.169823077
30.206	0	10.31029846	-0.228728077
30.2516	0	10.26006346	-0.208328077
30.2971	0	10.20396346	-0.228983077
30.3427	0	10.18458346	-0.220058077
30.3883	0	10.17871846	-0.213428077
30.4338	0	10.07212846	-0.203228077
30.4794	0	10.11955846	-0.229493077
30.5249	0	10.12261846	-0.254228077
30.5705	0	10.13944846	-0.254738077
30.6161	0	10.12516846	-0.372038077
30.6616	0	10.15321846	-0.365153077
30.7072	0	10.09533346	-0.412838077
30.7527	0	10.04305846	-0.424823077
30.7983	0	10.01500846	-0.458228077
30.8439	0	9.930858462	-0.416408077
30.8894	0	10.04203846	-0.389888077
30.935	0	10.05784846	-0.420488077
30.9805	0	10.04713846	-0.478118077
31.0261	0	10.00608346	-0.463328077
31.0717	0	10.08538846	-0.446498077
31.1172	0	10.00735846	-0.478118077
31.1628	0	10.07901346	-0.473528077
31.2083	0	9.939783462	-0.556913077
31.2539	0	9.815343462	-0.606893077
31.2994	0	9.816108462	-0.627038077
31.345	0	9.940803462	-0.630608077
31.3906	0	9.886743462	-0.629588077
31.4361	0	9.891843462	-0.666308077
31.4817	0	9.929583462	-0.653558077
31.5272	0	9.881133462	-0.679058077
31.5728	0	9.909693462	-0.714248077
31.6184	0	9.798768462	-0.729803077
31.6639	0	9.874758462	-0.712973077
31.7095	0	9.898473462	-0.770348077
31.755	0	9.748023462	-0.734903077
31.8006	0	9.740883462	-0.721898077
31.8462	0	9.663618462	-0.723938077
31.8917	0	9.626898462	-0.696398077
31.9373	0	9.595533462	-0.674468077
31.9828	0	9.629958462	-0.674978077
32.0284	0	9.596043462	-0.683393077
32.074	0	9.590943462	-0.658148077
32.1195	0	9.610323462	-0.673193077
32.1651	0	9.646788462	-0.666818077
32.2106	0	9.543258462	-0.635708077
32.2562	0	9.520308462	-0.643103077
32.3018	0	9.600633462	-0.634688077
32.3473	0	9.446613462	-0.627803077
32.3929	0	9.416778462	-0.656108077
32.4384	0	9.425958462	-0.645653077
32.484	0	9.483333462	-0.647948077
32.5296	0	9.505773462	-0.639023077
32.5751	0	9.501693462	-0.649223077
32.6207	0	9.588393462	-0.663248077
32.6662	0	9.655203462	-0.682118077
32.7118	0	9.650868462	-0.650243077
32.7574	0	9.678153462	-0.637748077
32.8029	0	9.643218462	-0.631118077
32.8485	0	9.630978462	-0.633668077
32.894	0	9.617208462	-0.650498077
32.9396	0	9.563658462	-0.717563077
32.9852	0	9.446103462	-0.706088077
33.0307	0	9.378273462	-0.732608077
33.0763	0	9.310188462	-0.794828077
33.1218	0	9.319878462	-0.798398077
33.1674	0	9.255618462	-0.813698077
33.213	0	9.148518462	-0.843023077
33.2585	0	9.161523462	-0.848378077
33.3041	0	9.019998462	-0.802988077
33.3496	0	9.130668462	-0.774173077
33.3952	0	9.081453462	-0.804008077
33.4408	0	9.095478462	-0.842768077
33.4863	0	9.134748462	-0.870563077
33.5319	0	9.122253462	-0.915953077
33.5774	0	8.989143462	-0.909068077
33.623	0	8.966958462	-0.928193077
33.6685	0	8.903973462	-0.898868077
33.7141	0	8.783868462	-0.936608077
33.7597	0	8.673453462	-0.910088077
33.8052	0	8.624748462	-0.903203077
33.8508	0	8.563293462	-0.907538077
33.8963	0	8.563038462	-0.880253077
33.9419	0	8.637753462	-0.834608077
33.9875	0	8.715783462	-0.815993077
34.033	0	8.647443462	-0.811658077
34.0786	0	8.622453462	-0.828743077
34.1241	0	8.512803462	-0.848378077
34.1697	0	8.567628462	-0.846848077
34.2153	0	8.507448462	-0.779783077
34.2608	0	8.388873462	-0.753008077
34.3064	0	8.262138462	-0.753518077
34.3519	0	8.253978462	-0.760658077
34.3975	0	8.140503462	-0.761678077
34.4431	0	8.127498462	-0.756833077
34.4886	0	8.137698462	-0.783863077
34.5342	0	8.050233462	-0.846593077
34.5797	0	8.197113462	-0.838943077
34.6253	0	8.251428462	-0.882548077
34.6709	0	8.172378462	-0.862148077
34.7164	0	8.244543462	-0.831803077
34.762	0	8.250153462	-0.738218077
34.8075	0	8.155038462	-0.763463077
34.8531	0	8.135658462	-0.749183077
34.8987	0	8.007648462	-0.751733077
34.9442	0	7.954098462	-0.775448077
34.9898	0	7.882443462	-0.748928077
35.0353	0	7.783758462	-0.788198077
35.0809	0	7.830423462	-0.755048077
35.1265	0	7.718478462	-0.780803077
35.172	0	7.631013462	-0.791258077
35.2176	0	7.525698462	-0.775448077
35.2631	0	7.395648462	-0.748673077
35.3087	0	7.362498462	-0.768563077
35.3543	0	7.379328462	-0.729293077
35.3998	0	7.366833462	-0.731333077
35.4454	0	7.407633462	-0.723938077
35.4909	0	7.316598462	-0.761678077
35.5365	0	7.259223462	-0.848633077
35.5821	0	7.229643462	-0.832823077
35.6276	0	7.169463462	-0.853223077
35.6732	0	7.148043462	-0.838178077
35.7187	0	7.111323462	-0.815993077
35.7643	0	7.145238462	-0.790748077
35.8099	0	7.032783462	-0.736943077
35.8554	0	7.011618462	-0.654068077
35.901	0	7.035078462	-0.647183077
35.9465	0	7.062363462	-0.649988077
35.9921	0	7.143453462	-0.705833077
36.0376	0	7.219698462	-0.739238077
36.0832	0	7.207458462	-0.746378077
36.1288	0	7.229388462	-0.787178077
36.1743	0	7.109028462	-0.780803077
36.2199	0	6.958578462	-0.804773077
36.2654	0	6.943788462	-0.773918077
36.311	0	6.821388462	-0.760913077
36.3566	0	6.784158462	-0.760658077
36.4021	0	6.863973462	-0.728273077
36.4477	0	6.932313462	-0.706598077
36.4932	0	6.890493462	-0.704813077
36.5388	0	6.758148462	-0.738218077
36.5844	0	6.769113462	-0.760148077
36.6299	0	6.606423462	-0.808598077
36.6755	0	6.657423462	-0.799418077
36.721	0	6.573528462	-0.758363077
36.7666	0	6.684708462	-0.718328077
36.8122	0	6.638298462	-0.715778077
36.8577	0	6.699498462	-0.683393077
36.9033	0	6.695163462	-0.672938077
36.9488	0	6.656403462	-0.698183077
36.9944	0	6.721173462	-0.689258077
37.04	0	6.645693462	-0.672683077
37.0855	0	6.558483462	-0.654068077
37.1311	0	6.562308462	-0.617093077
37.1766	0	6.518703462	-0.621683077
37.2222	0	6.506718462	-0.646163077
37.2678	0	6.573528462	-0.648713077
37.3133	0	6.551088462	-0.672938077
37.3589	0	6.454698462	-0.621938077
37.4044	0	6.501363462	-0.621428077
37.45	0	6.502638462	-0.593633077
37.4956	0	6.428433462	-0.602558077
37.5411	0	6.466683462	-0.580373077
37.5867	0	6.489123462	-0.572978077
37.6322	0	6.460053462	-0.535493077
37.6778	0	6.415173462	-0.560228077
37.7234	0	6.225963462	-0.569918077
37.7689	0	6.175728462	-0.570428077
37.8145	0	6.110193462	-0.556913077
37.86	0	6.007173462	-0.570428077
37.9056	0	5.927358462	-0.613013077
37.9512	0	5.910273462	-0.588023077
37.9967	0	5.868708462	-0.602558077
38.0423	0	5.963058462	-0.507953077
38.0878	0	6.042618462	-0.514838077
38.1334	0	5.910783462	-0.516368077
38.179	0	5.900583462	-0.502598077
38.2245	0	5.893698462	-0.543398077
38.2701	0	5.820258462	-0.484748077
38.3156	0	5.826888462	-0.489593077
38.3612	0	5.783793462	-0.466643077
38.4067	0	5.776908462	-0.475568077
38.4523	0	5.842953462	-0.461543077
38.4979	0	5.782008462	-0.485003077
38.5434	0	5.875848462	-0.471743077
38.589	0	5.878398462	-0.486023077
38.6345	0	5.877888462	-0.424058077
38.6801	0	5.940108462	-0.388868077
38.7257	0	5.950563462	-0.398813077
38.7712	0	5.982438462	-0.388103077
38.8168	0	5.981673462	-0.404678077
38.8623	0	6.044148462	-0.397538077
38.9079	0	6.008448462	-0.416153077
38.9535	0	5.999268462	-0.430433077
38.999	0	6.006153462	-0.407993077
39.0446	0	6.113253462	-0.439103077
39.0901	0	6.071178462	-0.440888077
39.1357	0	5.993658462	-0.423548077
39.1813	0	6.091068462	-0.456443077
39.2268	0	6.058938462	-0.448793077
39.2724	0	6.155328462	-0.469193077
39.3179	0	6.068373462	-0.485003077
39.3635	0	6.126258462	-0.480668077
39.4091	0	6.031398462	-0.483218077
39.4546	0	5.982693462	-0.480668077
39.5002	0	5.960508462	-0.431453077
39.5457	0	5.885793462	-0.468428077
39.5913	0	5.902878462	-0.463838077
39.6369	0	5.821023462	-0.478373077
39.6824	0	5.786343462	-0.477098077
39.728	0	5.758038462	-0.464603077
39.7735	0	5.697093462	-0.471998077
39.8191	0	5.732028462	-0.490868077
39.8647	0	5.671083462	-0.480158077
39.9102	0	5.575713462	-0.435278077
39.9558	0	5.524203462	-0.436298077
40.0013	0	5.543583462	-0.401108077
40.0469	0	5.660628462	-0.384023077
40.0925	0	5.618043462	-0.372038077
40.138	0	5.648388462	-0.397538077
40.1836	0	5.556843462	-0.384788077
40.2291	0	5.477283462	-0.383258077
40.2747	0	5.587443462	-0.374333077
40.3203	0	5.504823462	-0.336593077
40.3658	0	5.521908462	-0.302423077
40.4114	0	5.626968462	-0.317213077
40.4569	0	5.565768462	-0.269018077
40.5025	0	5.615238462	-0.238163077
40.548	0	5.649918462	-0.249893077
40.5936	0	5.649663462	-0.269783077
40.6392	0	5.592033462	-0.301148077
40.6847	0	5.651448462	-0.276413077
40.7303	0	5.571123462	-0.305993077
40.7758	0	5.470143462	-0.382238077
40.8214	0	5.363808462	-0.353678077
40.867	0	5.412258462	-0.339398077
40.9125	0	5.405883462	-0.253463077
40.9581	0	5.496153462	-0.220313077
41.0036	0	5.307963462	-0.198638077
41.0492	0	5.258493462	-0.239438077
41.0948	0	5.233248462	-0.247598077
41.1403	0	5.212338462	-0.246068077
41.1859	0	5.096313462	-0.232298077
41.2314	0	5.162868462	-0.239948077
41.277	0	5.054493462	-0.242243077
41.3226	0	5.044293462	-0.231278077
41.3681	0	5.000178462	-0.197108077
41.4137	0	4.952238462	-0.181298077
41.4592	0	5.027718462	-0.171863077
41.5048	0	4.981308462	-0.172883077
41.5504	0	4.975953462	-0.126218077
41.5959	0	5.052198462	-0.220568077
41.6415	0	5.055258462	-0.250658077
41.687	0	5.084328462	-0.242753077
41.7326	0	5.215908462	-0.247853077
41.7782	0	5.277363462	-0.195323077
41.8237	0	5.303628462	-0.186398077
41.8693	0	5.368143462	-0.203993077
41.9148	0	5.279403462	-0.194048077
41.9604	0	5.300568462	-0.166253077
42.006	0	5.330658462	-0.134123077
42.0515	0	5.322498462	-0.147128077
42.0971	0	5.425773462	-0.133613077
42.1426	0	5.325813462	-0.118058077
42.1882	0	5.316378462	-0.159623077
42.2338	0	5.308218462	-0.182573077
42.2793	0	5.263083462	-0.223373077
42.3249	0	5.333463462	-0.217253077
42.3704	0	5.380638462	-0.203993077
42.416	0	5.450763462	-0.183593077
42.4616	0	5.485953462	-0.091283077
42.5071	0	5.535168462	-0.085418077
42.5527	0	5.507883462	-0.115763077
42.5982	0	5.406393462	-0.144578077
42.6438	0	5.492073462	-0.201443077
42.6894	0	5.499723462	-0.299108077
42.7349	0	5.588208462	-0.289163077
42.7805	0	5.644053462	-0.288398077
42.826	0	5.536698462	-0.207818077
42.8716	0	5.410218462	-0.186653077
42.9171	0	5.450508462	-0.155033077
42.9627	0	5.433678462	-0.139478077
43.0083	0	5.435973462	-0.126728077
43.0538	0	5.482383462	-0.113723077
43.0994	0	5.476773462	-0.144578077
43.1449	0	5.531343462	-0.128003077
43.1905	0	5.507628462	-0.164723077
43.2361	0	5.457138462	-0.194303077
43.2816	0	5.390838462	-0.209858077
43.3272	0	5.523438462	-0.204248077
43.3727	0	5.551998462	-0.165233077
43.4183	0	5.471418462	-0.156818077
43.4639	0	5.621868462	-0.157583077
43.5094	0	5.604273462	-0.096128077
43.555	0	5.677203462	-0.141518077
43.6005	0	5.546133462	-0.198893077
43.6461	0	5.547153462	-0.174413077
43.6917	0	5.487993462	-0.150953077
43.7372	0	5.332443462	-0.166253077
43.7828	0	5.474478462	-0.170078077
43.8283	0	5.444643462	-0.166253077
43.8739	0	5.407158462	-0.127493077
43.9195	0	5.477793462	-0.169568077
43.965	0	5.481363462	-0.235358077
44.0106	0	5.533893462	-0.260603077
44.0561	0	5.533383462	-0.270803077
44.1017	0	5.459943462	-0.291713077
44.1473	0	5.418888462	-0.273353077
44.1928	0	5.522673462	-0.291968077
44.2384	0	5.504313462	-0.305738077
44.2839	0	5.396193462	-0.301403077
44.3295	0	5.471928462	-0.275903077
44.3751	0	5.444898462	-0.230513077
44.4206	0	5.368398462	-0.212408077
44.4662	0	5.260278462	-0.265703077
44.5117	0	5.380638462	-0.226178077
44.5573	0	5.438523462	-0.240458077
44.6029	0	5.461218462	-0.228983077
44.6484	0	5.518593462	-0.203738077
44.694	0	5.523693462	-0.178748077
44.7395	0	5.588718462	-0.149168077
44.7851	0	5.653488462	-0.177473077
44.8307	0	5.629773462	-0.181808077
44.8762	0	5.546388462	-0.233063077
44.9218	0	5.468868462	-0.212918077
44.9673	0	5.533638462	-0.194048077
45.0129	0	5.525733462	-0.157073077
45.0585	0	5.516043462	-0.138968077
45.104	0	5.503803462	-0.119843077
45.1496	0	5.416848462	-0.122903077
45.1951	0	5.507373462	-0.085928077
45.2407	0	5.447193462	-0.052778077
45.2862	0	5.372478462	-0.048188077
45.3318	0	5.276853462	-0.053543077
45.3774	0	5.203158462	-0.046913077
45.4229	0	5.189388462	-0.085418077
45.4685	0	5.152668462	-0.154523077
45.514	0	5.073873462	-0.129788077
45.5596	0	4.952238462	-0.114233077
45.6052	0	4.983348462	-0.135143077
45.6507	0	4.884663462	-0.145088077
45.6963	0	4.802298462	-0.145088077
45.7418	0	4.809693462	-0.134123077
45.7874	0	4.654653462	-0.128513077
45.833	0	4.605183462	-0.155288077
45.8785	0	4.482018462	-0.163448077
45.9241	0	4.513383462	-0.171863077
45.9696	0	4.578153462	-0.224393077
46.0152	0	4.484058462	-0.242498077
46.0608	0	4.552653462	-0.242753077
46.1063	0	4.465188462	-0.216233077
46.1519	0	4.502673462	-0.222098077
46.1974	0	4.462128462	-0.232553077
46.243	0	4.633998462	-0.240458077
46.2886	0	4.572798462	-0.237143077
46.3341	0	4.570758462	-0.223628077
46.3797	0	4.632468462	-0.219548077
46.4252	0	4.509048462	-0.237653077
46.4708	0	4.548318462	-0.253973077
46.5164	0	4.563618462	-0.230258077
46.5619	0	4.589373462	-0.235358077
46.6075	0	4.655163462	-0.243008077
46.653	0	4.706163462	-0.258563077
46.6986	0	4.758948462	-0.276158077
46.7442	0	4.878543462	-0.284573077
46.7897	0	4.889508462	-0.309818077
46.8353	0	4.934898462	-0.331493077
46.8808	0	4.838508462	-0.334298077
46.9264	0	4.890783462	-0.335573077
46.972	0	4.961418462	-0.330728077
47.0175	0	4.928013462	-0.330473077
47.0631	0	4.944078462	-0.347303077
47.1086	0	4.746708462	-0.357758077
47.1542	0	4.631448462	-0.384278077
47.1998	0	4.563873462	-0.401363077
47.2453	0	4.483548462	-0.401363077
47.2909	0	4.433313462	-0.387338077
47.3364	0	4.423878462	-0.431963077
47.382	0	4.397358462	-0.426353077
47.4276	0	4.408323462	-0.389888077
47.4731	0	4.404498462	-0.389123077
47.5187	0	4.342533462	-0.416408077
47.5642	0	4.455753462	-0.413858077
47.6098	0	4.505478462	-0.388103077
47.6553	0	4.474878462	-0.411563077
47.7009	0	4.428978462	-0.396518077
47.7465	0	4.373643462	-0.449813077
47.792	0	4.345083462	-0.467408077
47.8376	0	4.461873462	-0.475313077
47.8831	0	4.568718462	-0.485513077
47.9287	0	4.661028462	-0.518153077
47.9743	0	4.723248462	-0.546713077
48.0198	0	4.782918462	-0.562778077
48.0654	0	4.712028462	-0.566093077
48.1109	0	4.768383462	-0.576293077
48.1565	0	4.752828462	-0.571193077
48.2021	0	4.824228462	-0.587768077
48.2476	0	4.763793462	-0.543398077
48.2932	0	4.537353462	-0.503108077
48.3387	0	4.562343462	-0.524783077
48.3843	0	4.504968462	-0.560993077
48.4299	0	4.545003462	-0.567113077
48.4754	0	4.545003462	-0.548753077
48.521	0	4.423368462	-0.563543077
48.5665	0	4.201263462	-0.545948077
48.6121	0	4.147203462	-0.584453077
48.6577	0	4.167603462	-0.617858077
48.7032	0	4.064583462	-0.547733077
48.7488	0	3.979923462	-0.612503077
48.7943	0	3.966408462	-0.580628077
48.8399	0	3.927648462	-0.590063077
48.8855	0	4.012563462	-0.592358077
48.931	0	3.827433462	-0.623468077
48.9766	0	3.710388462	-0.593633077
49.0221	0	3.656073462	-0.598223077
49.0677	0	3.610173462	-0.556658077
49.1133	0	3.600738462	-0.529628077
49.1588	0	3.603033462	-0.504383077
49.2044	0	3.565803462	-0.504383077
49.2499	0	3.511488462	-0.540338077
49.2955	0	3.557133462	-0.560228077
49.3411	0	3.552798462	-0.581648077
49.3866	0	3.600228462	-0.573488077
49.4322	0	3.606858462	-0.577568077
49.4777	0	3.575748462	-0.578843077
49.5233	0	3.569118462	-0.577823077
49.5689	0	3.566568462	-0.595673077
49.6144	0	3.550758462	-0.605363077
49.66	0	3.602523462	-0.622703077
49.7055	0	3.626748462	-0.615053077
49.7511	0	3.579063462	-0.630353077
49.7967	0	3.498228462	-0.647438077
49.8422	0	3.515568462	-0.681098077
49.8878	0	3.571923462	-0.715523077
49.9333	0	3.510978462	-0.718838077
49.9789	0	3.554838462	-0.711698077
50.0244	0	3.650973462	-0.711188077
50.07	0	3.518628462	-0.704558077
50.1156	0	3.550758462	-0.695123077
50.1611	0	3.547443462	-0.683138077
50.2067	0	3.527808462	-0.709913077
50.2522	0	3.620118462	-0.694103077
50.2978	0	3.590028462	-0.689768077
50.3434	0	3.560958462	-0.696653077
50.3889	0	3.564273462	-0.664523077
50.4345	0	3.577278462	-0.654833077
50.48	0	3.650718462	-0.648713077
50.5256	0	3.729003462	-0.704048077
50.5712	0	3.753993462	-0.709658077
50.6167	0	3.674433462	-0.690023077
50.6623	0	3.600228462	-0.750713077
50.7078	0	3.640008462	-0.742043077
50.7534	0	3.589263462	-0.702008077
50.799	0	3.477318462	-0.698948077
50.8445	0	3.355683462	-0.624488077
50.8901	0	3.343188462	-0.597203077
50.9356	0	3.406173462	-0.583178077
50.9812	0	3.516843462	-0.582923077
51.0268	0	3.437283462	-0.616073077
51.0723	0	3.406428462	-0.576548077
51.1179	0	3.447738462	-0.537788077
51.1634	0	3.346758462	-0.572213077
51.209	0	3.275103462	-0.607913077
51.2546	0	3.272808462	-0.616073077
51.3001	0	3.254958462	-0.511268077
51.3457	0	3.128988462	-0.545948077
51.3912	0	3.115473462	-0.541868077
51.4368	0	3.073398462	-0.546968077
51.4824	0	3.015003462	-0.575783077
51.5279	0	3.027753462	-0.595418077
51.5735	0	2.994348462	-0.598988077
51.619	0	2.957373462	-0.595418077
51.6646	0	3.026478462	-0.575273077
51.7102	0	2.990013462	-0.575273077
51.7557	0	2.961198462	-0.596183077
51.8013	0	3.009393462	-0.611483077
51.8468	0	2.923458462	-0.660188077
51.8924	0	2.948703462	-0.649988077
51.938	0	3.074418462	-0.639533077
51.9835	0	3.076203462	-0.638513077
52.0291	0	3.024693462	-0.644633077
52.0746	0	3.021378462	-0.605618077
52.1202	0	3.077478462	-0.624233077
52.1657	0	3.074928462	-0.634433077
52.2113	0	3.130263462	-0.636473077
52.2569	0	3.152193462	-0.638003077
52.3024	0	3.144033462	-0.642338077
52.348	0	3.097368462	-0.657638077
52.3935	0	3.136128462	-0.698438077
52.4391	0	2.976243462	-0.670388077
52.4847	0	3.080538462	-0.649223077
52.5302	0	3.013218462	-0.659678077
52.5758	0	2.901273462	-0.681353077
52.6213	0	2.963748462	-0.687728077
52.6669	0	2.937993462	-0.684668077
52.7125	0	3.030813462	-0.670898077
52.758	0	2.941308462	-0.638768077
52.8036	0	2.950233462	-0.617348077
52.8491	0	2.973438462	-0.564818077
52.8947	0	2.883678462	-0.567113077
52.9403	0	2.831403462	-0.579863077
52.9858	0	2.735268462	-0.573743077
53.0314	0	2.707983462	-0.527843077
53.0769	0	2.671263462	-0.540338077
53.1225	0	2.676108462	-0.521723077
53.1681	0	2.505258462	-0.580628077
53.2136	0	2.412948462	-0.570938077
53.2592	0	2.472363462	-0.546713077
53.3047	0	2.400198462	-0.530903077
53.3503	0	2.367048462	-0.524018077
53.3959	0	2.367048462	-0.494183077
53.4414	0	2.335173462	-0.478883077
53.487	0	2.242863462	-0.464348077
53.5325	0	2.135763462	-0.460013077
53.5781	0	2.042688462	-0.450578077
53.6237	0	2.021523462	-0.450068077
53.6692	0	1.898868462	-0.461033077
53.7148	0	1.904733462	-0.429158077
53.7603	0	1.887138462	-0.375608077
53.8059	0	1.780038462	-0.363113077
53.8515	0	1.782078462	-0.396263077
53.897	0	1.772388462	-0.408248077
53.9426	0	1.851438462	-0.400598077
53.9881	0	1.908048462	-0.389378077
54.0337	0	1.920543462	-0.394223077
54.0793	0	1.924368462	-0.414113077
54.1248	0	1.944513462	-0.453893077
54.1704	0	1.886118462	-0.452108077
54.2159	0	1.914678462	-0.426098077
54.2615	0	1.880253462	-0.459503077
54.3071	0	1.859598462	-0.449048077
54.3526	0	1.824918462	-0.426608077
54.3982	0	1.806048462	-0.417428077
54.4437	0	1.731588462	-0.408758077
54.4893	0	1.848633462	-0.359288077
54.5348	0	1.901418462	-0.315683077
54.5804	0	1.860873462	-0.344753077
54.626	0	1.724448462	-0.328943077
54.6715	0	1.793808462	-0.333788077
54.7171	0	1.677018462	-0.353933077
54.7626	0	1.555638462	-0.331493077
54.8082	0	1.594143462	-0.320273077
54.8538	0	1.680588462	-0.309053077
54.8993	0	1.670643462	-0.270803077
54.9449	0	1.695633462	-0.258053077
54.9904	0	1.615818462	-0.242243077
55.036	0	1.613268462	-0.213938077
55.0816	0	1.600263462	-0.238418077
55.1271	0	1.683393462	-0.280493077
55.1727	0	1.674723462	-0.269528077
55.2182	0	1.618878462	-0.310583077
55.2638	0	1.602303462	-0.285083077
55.3094	0	1.563288462	-0.308033077
55.3549	0	1.554618462	-0.314153077
55.4005	0	1.635198462	-0.281513077
55.446	0	1.566858462	-0.294518077
55.4916	0	1.542633462	-0.293498077
55.5372	0	1.555128462	-0.341693077
55.5827	0	1.649478462	-0.293243077
55.6283	0	1.715268462	-0.370508077
55.6738	0	1.661973462	-0.360563077
55.7194	0	1.650498462	-0.383003077
55.765	0	1.744083462	-0.395498077
55.8105	0	1.928193462	-0.449303077
55.8561	0	1.855008462	-0.415388077
55.9016	0	1.719348462	-0.445988077
55.9472	0	1.576293462	-0.505148077
55.9928	0	1.513053462	-0.539318077
56.0383	0	1.419723462	-0.558953077
56.0839	0	1.436553462	-0.537023077
56.1294	0	1.330473462	-0.585728077
56.175	0	1.276668462	-0.592868077
56.2206	0	1.231278462	-0.577313077
56.2661	0	1.187163462	-0.521213077
56.3117	0	1.175688462	-0.501068077
56.3572	0	1.095873462	-0.486023077
56.4028	0	1.007133462	-0.470468077
56.4484	0	1.025748462	-0.453128077
56.4939	0	0.998973462	-0.503618077
56.5395	0	1.102248462	-0.519173077
56.585	0	1.071138462	-0.507188077
56.6306	0	1.100973462	-0.432218077
56.6762	0	1.041558462	-0.399068077
56.7217	0	1.038498462	-0.348833077
56.7673	0	1.016313462	-0.351383077
56.8128	0	0.962763462	-0.366938077
56.8584	0	0.938028462	-0.351128077
56.9039	0	1.062978462	-0.321038077
56.9495	0	0.984183462	-0.334553077
56.9951	0	0.942873462	-0.377138077
57.0406	0	0.956133462	-0.377648077
57.0862	0	0.969138462	-0.412328077
57.1317	0	0.842658462	-0.394988077
57.1773	0	0.769983462	-0.426353077
57.2229	0	0.700878462	-0.467153077
57.2684	0	0.801858462	-0.437828077
57.314	0	0.702408462	-0.472763077
57.3595	0	0.613413462	-0.452873077
57.4051	0	0.668238462	-0.466643077
57.4507	0	0.713118462	-0.466133077
57.4962	0	0.706998462	-0.461288077
57.5418	0	0.683283462	-0.475823077
57.5873	0	0.633048462	-0.482453077
57.6329	0	0.680223462	-0.472508077
57.6785	0	0.774573462	-0.543398077
57.724	0	0.867393462	-0.552068077
57.7696	0	0.878358462	-0.515348077
57.8151	0	0.842658462	-0.539828077
57.8607	0	0.690423462	-0.458738077
57.9063	0	0.650388462	-0.509483077
57.9518	0	0.650643462	-0.584198077
57.9974	0	0.653448462	-0.575018077
58.0429	0	0.649113462	-0.584963077
58.0885	0	0.696033462	-0.607658077
58.1341	0	0.733008462	-0.699713077
58.1796	0	0.739128462	-0.678548077
58.2252	0	0.734793462	-0.671663077
58.2707	0	0.712608462	-0.688493077
58.3163	0	0.666708462	-0.684668077
58.3619	0	0.705468462	-0.727763077
58.4074	0	0.649113462	-0.716543077
58.453	0	0.660843462	-0.684923077
58.4985	0	0.673083462	-0.691808077
58.5441	0	0.685578462	-0.697673077
58.5897	0	0.695778462	-0.672428077
58.6352	0	0.611628462	-0.679058077
58.6808	0	0.637893462	-0.681863077
58.7263	0	0.680478462	-0.686963077
58.7719	0	0.658038462	-0.746633077
58.8175	0	0.710313462	-0.695123077
58.863	0	0.698838462	-0.755813077
58.9086	0	0.675378462	-0.772898077
58.9541	0	0.602448462	-0.731078077
58.9997	0	0.623868462	-0.699713077
59.0453	0	0.554508462	-0.697163077
59.0908	0	0.531813462	-0.688493077
59.1364	0	0.530793462	-0.700223077
59.1819	0	0.547113462	-0.732863077
59.2275	0	0.565218462	-0.691298077
59.273	0	0.570063462	-0.723938077
59.3186	0	0.457863462	-0.730313077
59.3642	0	0.530793462	-0.750458077
59.4097	0	0.538443462	-0.748673077
59.4553	0	0.578478462	-0.730823077
59.5008	0	0.645543462	-0.737198077
59.5464	0	0.547368462	-0.690278077
59.592	0	0.546858462	-0.724703077
59.6375	0	0.480558462	-0.672173077
59.6831	0	0.534873462	-0.682373077
59.7286	0	0.574908462	-0.697163077
59.7742	0	0.594543462	-0.705068077
59.8198	0	0.540483462	-0.680588077
59.8653	0	0.472653462	-0.668093077
59.9109	0	0.457098462	-0.675998077
59.9564	0	0.558078462	-0.648968077
60.002	0	0.651663462	-0.638768077
60.0476	0	0.698328462	-0.624743077
60.0931	0	0.732243462	-0.605618077
60.1387	0	0.759018462	-0.571958077
60.1842	0	0.684048462	-0.552323077
60.2298	0	0.641973462	-0.552068077
60.2754	0	0.607548462	-0.567113077
60.3209	0	0.604488462	-0.591593077
60.3665	0	0.654723462	-0.582158077
60.412	0	0.643248462	-0.623978077
60.4576	0	0.693993462	-0.630098077
60.5032	0	0.804918462	-0.627293077
60.5487	0	0.812313462	-0.608168077
60.5943	0	0.873258462	-0.657638077
60.6398	0	0.951543462	-0.694868077
60.6854	0	0.939048462	-0.645143077
60.731	0	0.911763462	-0.592103077
60.7765	0	0.984183462	-0.557678077
60.8221	0	0.980868462	-0.591083077
60.8676	0	0.980358462	-0.606893077
60.9132	0	0.982653462	-0.600008077
60.9588	0	0.953073462	-0.604598077
61.0043	0	1.029573462	-0.594908077
61.0499	0	1.015548462	-0.630863077
61.0954	0	0.997698462	-0.630863077
61.141	0	1.020903462	-0.620408077
61.1866	0	1.010958462	-0.668858077
61.2321	0	0.979593462	-0.672683077
61.2777	0	1.027278462	-0.642083077
61.3232	0	0.918393462	-0.702008077
61.3688	0	0.890343462	-0.743063077
61.4143	0	0.840618462	-0.726233077
61.4599	0	0.913038462	-0.703028077
61.5055	0	0.983418462	-0.687473077
61.551	0	1.032123462	-0.610463077
61.5966	0	1.038498462	-0.638513077
61.6421	0	0.940833462	-0.631118077
61.6877	0	0.864843462	-0.636473077
61.7333	0	0.896973462	-0.675743077
61.7788	0	0.838068462	-0.633668077
61.8244	0	0.954093462	-0.653303077
61.8699	0	0.910488462	-0.679568077
61.9155	0	0.871728462	-0.654578077
61.9611	0	0.870198462	-0.611738077
62.0066	0	0.845718462	-0.588278077
62.0522	0	0.881163462	-0.587513077
62.0977	0	0.831693462	-0.620153077
62.1433	0	0.886773462	-0.608933077
62.1889	0	0.887028462	-0.559973077
62.2344	0	0.939813462	-0.615308077
62.28	0	0.971943462	-0.548243077
62.3255	0	0.892128462	-0.472253077
62.3711	0	0.967098462	-0.450833077
62.4167	0	1.000758462	-0.441908077
62.4622	0	0.896208462	-0.359288077
62.5078	0	0.947208462	-0.338633077
62.5533	0	0.831693462	-0.320528077
62.5989	0	0.834753462	-0.320273077
62.6445	0	0.825828462	-0.303443077
62.69	0	0.858468462	-0.371273077
62.7356	0	1.073178462	-0.313133077
62.7811	0	1.227963462	-0.258308077
62.8267	0	1.257543462	-0.219803077
62.8723	0	1.245048462	-0.195068077
62.9178	0	1.220823462	-0.214448077
62.9634	0	1.270293462	-0.233828077
63.0089	0	1.392183462	-0.205268077
63.0545	0	1.508463462	-0.157073077
63.1001	0	1.519683462	-0.173903077
63.1456	0	1.573233462	-0.152483077
63.1912	0	1.680078462	-0.181808077
63.2367	0	1.679313462	-0.184103077
63.2823	0	1.627548462	-0.218018077
63.3279	0	1.612758462	-0.178493077
63.3734	0	1.509228462	-0.178748077
63.419	0	1.487298462	-0.154523077
63.4645	0	1.485768462	-0.198128077
63.5101	0	1.475058462	-0.194558077
63.5557	0	1.347303462	-0.189968077
63.6012	0	1.279473462	-0.145853077
63.6468	0	1.171098462	-0.154268077
63.6923	0	1.152483462	-0.184613077
63.7379	0	1.216998462	-0.234593077
63.7834	0	1.286868462	-0.213683077
63.829	0	1.105308462	-0.204248077
63.8746	0	1.049463462	-0.219803077
63.9201	0	0.912528462	-0.232043077
63.9657	0	0.982143462	-0.268253077
64.0112	0	1.047423462	-0.280493077
64.0568	0	1.049463462	-0.238163077
64.1024	0	0.976533462	-0.231788077
64.1479	0	0.951543462	-0.242753077
64.1935	0	0.928593462	-0.245813077
64.239	0	0.863823462	-0.190223077
64.2846	0	0.858723462	-0.195323077
64.3302	0	0.815118462	-0.187418077
64.3757	0	0.884733462	-0.210113077
64.4213	0	0.901053462	-0.235613077
64.4668	0	0.912783462	-0.221078077
64.5124	0	0.869688462	-0.226688077
64.558	0	0.748053462	-0.235613077
64.6035	0	0.798543462	-0.306248077
64.6491	0	0.752898462	-0.282533077
64.6946	0	0.864078462	-0.282788077
64.7402	0	0.864588462	-0.255503077
64.7858	0	0.847248462	-0.245813077
64.8313	0	0.860763462	-0.244028077
64.8769	0	0.823533462	-0.240458077
64.9224	0	0.629478462	-0.226433077
64.968	0	0.629478462	-0.226433077
65.0136	0	0.629478462	-0.226433077
65.0591	0	0.629478462	-0.226433077
65.1047	0	0.629478462	-0.226433077
65.1502	0	0.629478462	-0.226433077
65.1958	0	0.629478462	-0.226433077
65.2414	0	0.629478462	-0.226433077
65.2869	0	0.629478462	-0.226433077
65.3325	0	0.629478462	-0.226433077
65.378	0	0.629478462	-0.226433077
65.4236	0	0.629478462	-0.226433077
65.4692	0	0.629478462	-0.226433077
65.5147	0	0.629478462	-0.226433077
65.5603	0	0.629478462	-0.226433077
65.6058	0	0.629478462	-0.226433077
65.6514	0	0.629478462	-0.226433077
65.697	0	0.629478462	-0.226433077
65.7425	0	0.629478462	-0.226433077
65.7881	0	0.629478462	-0.226433077
65.8336	0	0.629478462	-0.226433077
65.8792	0	0.629478462	-0.226433077
65.9248	0	0.629478462	-0.226433077
65.9703	0	0.629478462	-0.226433077
66.0159	0	0.629478462	-0.226433077
66.0614	0	0.629478462	-0.226433077
66.107	0	0.629478462	-0.226433077
66.1525	0	0.629478462	-0.226433077
66.1981	0	0.629478462	-0.226433077
66.2437	0	0.629478462	-0.226433077
66.2892	0	0.629478462	-0.226433077
66.3348	0	0.629478462	-0.226433077
66.3803	0	0.629478462	-0.226433077
66.4259	0	0.629478462	-0.226433077
66.4715	0	0.629478462	-0.226433077
66.517	0	0.629478462	-0.226433077
66.5626	0	0.629478462	-0.226433077
66.6081	0	0.629478462	-0.226433077
66.6537	0	0.629478462	-0.226433077
66.6993	0	0.629478462	-0.226433077
66.7448	0	0.629478462	-0.226433077
66.7904	0	0.629478462	-0.226433077
66.8359	0	0.629478462	-0.226433077
66.8815	0	0.629478462	-0.226433077
66.9271	0	0.629478462	-0.226433077
66.9726	0	0.629478462	-0.226433077
67.0182	0	0.629478462	-0.226433077
67.0637	0	0.629478462	-0.226433077
67.1093	0	0.629478462	-0.226433077
67.1549	0	0.629478462	-0.226433077
67.2004	0	0.629478462	-0.226433077
67.246	0	0.629478462	-0.226433077
67.2915	0	0.629478462	-0.226433077
67.3371	0	0.629478462	-0.226433077
67.3827	0	0.629478462	-0.226433077
67.4282	0	0.629478462	-0.226433077
67.4738	0	0.629478462	-0.226433077
67.5193	0	0.629478462	-0.226433077
67.5649	0	0.629478462	-0.226433077
67.6105	0	0.629478462	-0.226433077
67.656	0	0.629478462	-0.226433077
67.7016	0	0.629478462	-0.226433077
67.7471	0	0.629478462	-0.226433077
67.7927	0	0.629478462	-0.226433077
67.8383	0	0.629478462	-0.226433077
67.8838	0	0.629478462	-0.226433077
67.9294	0	0.629478462	-0.226433077
67.9749	0	0.629478462	-0.226433077
68.0205	0	0.629478462	-0.226433077
68.0661	0	0.629478462	-0.226433077
68.1116	0	0.629478462	-0.226433077
68.1572	0	0.629478462	-0.226433077
68.2027	0	0.629478462	-0.226433077
68.2483	0	0.629478462	-0.226433077
68.2939	0	0.629478462	-0.226433077
68.3394	0	0.629478462	-0.226433077
