# Supplementary material for: Genetically engineered mice for combinatorial cardiovascular optobiology
Source: eLife. 2021 Oct 29;10:e67858. doi: 10.7554/eLife.67858 (PMC8555989; doi:10.7554/eLife.67858)
Supplement: Figure 7—source data 2. [file elife-67858-fig7-data2.csv]

Time, seconds	laser	Lf	mid	Rt
0	0	0.280245	2.46738	0.26877
0.0456	0	0.280245	2.46738	0.26877
0.0911	0	0.280245	2.46738	0.26877
0.1367	0	0.280245	2.46738	0.26877
0.1822	0	0.280245	2.46738	0.26877
0.2278	0	0.280245	2.46738	0.26877
0.2734	0	0.280245	2.46738	0.26877
0.3189	0	0.280245	2.46738	0.26877
0.3645	0	0.280245	2.46738	0.26877
0.41	0	0.280245	2.46738	0.26877
0.4556	0	0.280245	2.46738	0.26877
0.5012	0	0.280245	2.46738	0.26877
0.5467	0	0.280245	2.46738	0.26877
0.5923	0	0.280245	2.46738	0.26877
0.6378	0	0.280245	2.46738	0.26877
0.6834	0	0.280245	2.46738	0.26877
0.729	0	0.280245	2.46738	0.26877
0.7745	0	0.280245	2.46738	0.26877
0.8201	0	0.280245	2.46738	0.26877
0.8656	0	0.280245	2.46738	0.26877
0.9112	0	0.280245	2.46738	0.26877
0.9568	0	0.280245	2.46738	0.26877
1.0023	0	0.280245	2.46738	0.26877
1.0479	0	0.280245	2.46738	0.26877
1.0934	0	0.280245	2.46738	0.26877
1.139	0	0.280245	2.46738	0.26877
1.1845	0	0.280245	2.46738	0.26877
1.2301	0	0.280245	2.46738	0.26877
1.2757	0	0.280245	2.46738	0.26877
1.3212	0	0.280245	2.46738	0.26877
1.3668	0	0.280245	2.46738	0.26877
1.4123	0	0.280245	2.46738	0.26877
1.4579	0	0.280245	2.46738	0.26877
1.5035	0	0.280245	2.46738	0.26877
1.549	0	0.280245	2.46738	0.26877
1.5946	0	0.280245	2.46738	0.26877
1.6401	0	0.280245	2.46738	0.26877
1.6857	0	0.280245	2.46738	0.26877
1.7313	0	0.280245	2.46738	0.26877
1.7768	0	0.280245	2.46738	0.26877
1.8224	0	0.280245	2.46738	0.26877
1.8679	0	0.280245	2.46738	0.26877
1.9135	0	0.280245	2.46738	0.26877
1.9591	0	0.280245	2.46738	0.26877
2.0046	0	0.280245	2.46738	0.26877
2.0502	0	0.280245	2.46738	0.26877
2.0957	0	0.280245	2.46738	0.26877
2.1413	0	0.280245	2.46738	0.26877
2.1869	0	0.280245	2.46738	0.26877
2.2324	0	0.280245	2.46738	0.26877
2.278	0	0.280245	2.46738	0.26877
2.3235	0	0.280245	2.46738	0.26877
2.3691	0	0.280245	2.46738	0.26877
2.4147	0	0.280245	2.46738	0.26877
2.4602	0	0.280245	2.46738	0.26877
2.5058	0	0.280245	2.46738	0.26877
2.5513	0	0.280245	2.46738	0.26877
2.5969	0	0.280245	2.46738	0.26877
2.6425	0	0.280245	2.46738	0.26877
2.688	0	0.280245	2.46738	0.26877
2.7336	0	0.280245	2.46738	0.26877
2.7791	0	0.280245	2.46738	0.26877
2.8247	0	0.280245	2.46738	0.26877
2.8703	0	0.280245	2.46738	0.26877
2.9158	0	0.280245	2.46738	0.26877
2.9614	0	0.280245	2.46738	0.26877
3.0069	0	0.280245	2.46738	0.26877
3.0525	0	0.280245	2.46738	0.26877
3.0981	0	0.280245	2.46738	0.26877
3.1436	0	0.280245	2.46738	0.26877
3.1892	0	0.280245	2.46738	0.26877
3.2347	0	0.280245	2.46738	0.26877
3.2803	0	0.280245	2.46738	0.26877
3.3259	0	0.280245	2.46738	0.26877
3.3714	0	0.280245	2.46738	0.26877
3.417	0	0.280245	2.46738	0.26877
3.4625	0	0.27081	2.465085	0.261375
3.5081	0	0.257805	2.45718	0.255
3.5536	0	0.287895	2.44953	0.254235
3.5992	0	0.27795	2.436525	0.255255
3.6448	0	0.27285	2.42964	0.25755
3.6903	0	0.281265	2.42811	0.26367
3.7359	0	0.28458	2.426835	0.254235
3.7814	0	0.259845	2.422755	0.255
3.827	0	0.24225	2.407455	0.26673
3.8726	0	0.21318	2.395725	0.26775
3.9181	0	0.213945	2.3715	0.27897
3.9637	0	0.21624	2.391645	0.278715
4.0092	0	0.220575	2.380425	0.302175
4.0548	0	0.2244	2.3868	0.31314
4.1004	0	0.25449	2.401335	0.31467
4.1459	0	0.256275	2.404395	0.31875
4.1915	0	0.271065	2.407965	0.326145
4.237	0	0.24531	2.41026	0.324615
4.2826	0	0.240465	2.4072	0.335325
4.3282	0	0.23613	2.395725	0.34374
4.3737	0	0.24735	2.399805	0.34782
4.4193	0	0.2397	2.40006	0.35649
4.4648	0	0.23613	2.391645	0.354705
4.5104	0	0.241995	2.38833	0.360315
4.556	0	0.2346	2.389605	0.358785
4.6015	0	0.23511	2.38068	0.356235
4.6471	0	0.23358	2.38017	0.363885
4.6926	0	0.246585	2.389605	0.361845
4.7382	0	0.240465	2.389095	0.371025
4.7838	0	0.24378	2.38833	0.37638
4.8293	0	0.252195	2.39292	0.39168
4.8749	0	0.24837	2.382465	0.401115
4.9204	0	0.254745	2.38731	0.395505
4.966	0	0.23409	2.38221	0.393975
5.0116	0	0.23052	2.389605	0.397545
5.0571	0	0.232305	2.3868	0.404685
5.1027	0	0.2397	2.373795	0.416925
5.1482	0	0.244035	2.352885	0.422025
5.1938	0	0.25041	2.36538	0.418965
5.2394	0	0.29886	2.371245	0.426105
5.2849	0	0.28101	2.37252	0.43758
5.3305	0	0.28611	2.40261	0.452115
5.376	0	0.29835	2.4174	0.466905
5.4216	0	0.304725	2.4072	0.477105
5.4672	0	0.285345	2.40924	0.48909
5.5127	0	0.276675	2.41587	0.49062
5.5583	0	0.28254	2.42301	0.48705
5.6038	0	0.299625	2.410005	0.4845
5.6494	0	0.30498	2.41128	0.47583
5.695	0	0.287385	2.416635	0.47124
5.7405	0	0.28764	2.408475	0.46257
5.7861	0	0.26112	2.40312	0.459255
5.8316	0	0.250155	2.401335	0.46359
5.8772	0	0.262395	2.38476	0.454155
5.9227	0	0.2499	2.37456	0.457215
5.9683	0	0.24378	2.37813	0.462825
6.0139	0	0.24123	2.37864	0.457215
6.0594	0	0.248625	2.372775	0.46359
6.105	0	0.245565	2.37864	0.456195
6.1505	0	0.24123	2.39955	0.455175
6.1961	0	0.23868	2.41434	0.448035
6.2417	0	0.236385	2.42046	0.474555
6.2872	0	0.236895	2.410515	0.470475
6.3328	0	0.238425	2.40261	0.4743
6.3783	0	0.23766	2.39445	0.472005
6.4239	0	0.26367	2.40924	0.46563
6.4695	0	0.24378	2.39853	0.46614
6.515	0	0.229755	2.39394	0.468945
6.5606	0	0.2295	2.396235	0.47583
6.6061	0	0.234855	2.38119	0.46563
6.6517	0	0.222615	2.37864	0.46308
6.6973	0	0.22491	2.375325	0.46002
6.7428	0	0.22848	2.36793	0.46563
6.7884	0	0.23766	2.360025	0.466905
6.8339	0	0.237915	2.365125	0.464865
6.8795	0	0.23307	2.375325	0.462315
6.9251	0	0.230775	2.366655	0.46257
6.9706	0	0.233325	2.349315	0.45696
7.0162	0	0.23358	2.348295	0.456705
7.0617	0	0.231795	2.336565	0.46512
7.1073	0	0.241995	2.309535	0.465375
7.1529	0	0.256275	2.30265	0.461805
7.1984	0	0.259845	2.283015	0.45288
7.244	0	0.293505	2.26287	0.44829
7.2895	0	0.297585	2.24043	0.43911
7.3351	0	0.30141	2.24247	0.42789
7.3807	0	0.29529	2.22156	0.42993
7.4262	0	0.300135	2.22054	0.42687
7.4718	0	0.303705	2.23278	0.424065
7.5173	0	0.3009	2.24604	0.416925
7.5629	0	0.301665	2.248335	0.42024
7.6085	0	0.304725	2.245275	0.41922
7.654	0	0.30855	2.24502	0.421515
7.6996	0	0.3009	2.247315	0.410295
7.7451	0	0.305745	2.23839	0.398565
7.7907	0	0.293505	2.243745	0.390405
7.8363	0	0.269535	2.240175	0.38811
7.8818	0	0.247095	2.235075	0.37026
7.9274	0	0.243525	2.234565	0.37434
7.9729	0	0.237915	2.221305	0.370515
8.0185	0	0.283305	2.205495	0.368985
8.0641	0	0.286365	2.212125	0.36057
8.1096	0	0.25806	2.203965	0.3621
8.1552	0	0.259845	2.194785	0.37485
8.2007	0	0.264945	2.17413	0.378675
8.2463	0	0.26112	2.167755	0.384795
8.2918	0	0.2652	2.168265	0.39423
8.3374	0	0.264945	2.16291	0.392955
8.383	0	0.256785	2.14965	0.397035
8.4285	0	0.266985	2.12874	0.38658
8.4741	0	0.26724	2.11701	0.384285
8.5196	0	0.2907	2.1165	0.39321
8.5652	0	0.291975	2.090745	0.40239
8.6108	0	0.299625	2.086155	0.400605
8.6563	0	0.26622	2.085645	0.405705
8.7019	0	0.259845	2.07366	0.39984
8.7474	0	0.24276	2.0604	0.408
8.793	0	0.2499	2.05173	0.3978
8.8386	0	0.24174	2.04408	0.393465
8.8841	0	0.285345	2.036175	0.39678
8.9297	0	0.265965	2.01858	0.388875
8.9752	0	0.25806	2.00073	0.38913
9.0208	0	0.25245	1.98696	0.37842
9.0664	0	0.274635	1.975485	0.37332
9.1119	0	0.255	1.963245	0.378165
9.1575	0	0.247095	1.94106	0.368985
9.203	0	0.241485	1.943865	0.361845
9.2486	0	0.239955	1.930095	0.36108
9.2942	0	0.22746	1.907655	0.356235
9.3397	0	0.203745	1.89159	0.34527
9.3853	0	0.203745	1.875525	0.329205
9.4308	0	0.211905	1.850025	0.33201
9.4764	0	0.22236	1.835235	0.320535
9.522	0	0.202215	1.806675	0.319515
9.5675	0	0.189465	1.781175	0.31416
9.6131	0	0.19176	1.762815	0.32079
9.6586	0	0.205275	1.74522	0.30804
9.7042	0	0.202215	1.74726	0.302685
9.7498	0	0.18921	1.727115	0.304725
9.7953	0	0.22134	1.719975	0.303195
9.8409	2	0.246075	1.678155	0.29019
9.8864	2	0.25092	1.66413	0.295545
9.932	2	0.24684	1.63659	0.29682
9.9776	2	0.24429	1.617465	0.296565
10.0231	2	0.230265	1.590945	0.29223
10.0687	2	0.21165	1.551165	0.29223
10.1142	2	0.238425	1.530255	0.284835
10.1598	2	0.230775	1.493535	0.301155
10.2054	2	0.236385	1.473645	0.29631
10.2509	2	0.22287	1.4535	0.29682
10.2965	2	0.225165	1.438965	0.30396
10.342	2	0.235875	1.411935	0.300645
10.3876	2	0.201195	1.376745	0.29631
10.4331	2	0.204255	1.3362	0.298605
10.4787	2	0.20247	1.310445	0.29631
10.5243	2	0.20859	1.27041	0.277185
10.5698	2	0.19482	1.248225	0.282285
10.6154	2	0.182835	1.24236	0.27999
10.6609	2	0.20043	1.231395	0.26418
10.7065	2	0.22746	1.2087	0.255255
10.7521	2	0.227205	1.187535	0.241485
10.7976	2	0.22695	1.16178	0.23256
10.8432	2	0.20349	1.13781	0.21726
10.8887	2	0.19584	1.09446	0.21114
10.9343	2	0.16677	1.03785	0.199155
10.9799	2	0.157845	0.997815	0.19686
11.0254	2	0.140505	0.971805	0.180795
11.071	2	0.161925	0.942225	0.1734
11.1165	2	0.13872	0.93483	0.16728
11.1621	2	0.142545	0.89556	0.15045
11.2077	2	0.13005	0.87363	0.147645
11.2532	2	0.130815	0.856545	0.143055
11.2988	2	0.135915	0.838695	0.14382
11.3443	2	0.12801	0.82416	0.14178
11.3899	2	0.128265	0.811155	0.13668
11.4355	2	0.1275	0.7956	0.13566
11.481	2	0.119595	0.76398	0.126735
11.5266	2	0.10302	0.735165	0.128775
11.5721	2	0.09996	0.72267	0.125715
11.6177	2	0.0918	0.69666	0.119595
11.6633	2	0.086445	0.67014	0.120615
11.7088	2	0.07752	0.65739	0.108885
11.7544	2	0.075225	0.62016	0.105825
11.7999	2	0.07446	0.6069	0.10098
11.8455	2	0.07905	0.591855	0.088485
11.8911	2	0.07344	0.56763	0.07854
11.9366	2	0.092055	0.55845	0.06426
11.9822	2	0.08568	0.539835	0.063495
12.0277	2	0.07395	0.517905	0.05763
12.0733	2	0.06579	0.487815	0.04335
12.1189	2	0.0765	0.466395	0.0255
12.1644	2	0.06936	0.434775	0.007395
12.21	2	0.061965	0.3774	-0.01836
12.2555	2	0.058905	0.34884	-0.03213
12.3011	2	0.062985	0.33201	-0.049215
12.3467	2	0.06018	0.322065	-0.052785
12.3922	2	0.05712	0.295035	-0.05712
12.4378	2	0.053295	0.280755	-0.06069
12.4833	2	0.0459	0.266475	-0.056355
12.5289	2	0.051255	0.24684	-0.058395
12.5745	2	0.05814	0.229245	-0.055845
12.62	2	0.08058	0.214965	-0.056355
12.6656	2	0.095625	0.201705	-0.04182
12.7111	2	0.080835	0.186915	-0.04437
12.7567	2	0.08313	0.180285	-0.04794
12.8022	2	0.084915	0.16065	-0.046665
12.8478	2	0.07089	0.148155	-0.031875
12.8934	2	0.06426	0.127245	-0.03213
12.9389	2	0.063495	0.107355	-0.0255
12.9845	2	0.05967	0.076245	-0.02448
13.03	2	0.05712	0.06426	-0.01632
13.0756	2	0.060945	0.050235	-0.02091
13.1212	2	0.0561	0.05304	-0.017085
13.1667	2	0.05253	0.05049	-0.018105
13.2123	2	0.04284	0.05865	-0.00561
13.2578	2	0.0357	0.05253	-0.00204
13.3034	2	0.029835	0.0408	0.005355
13.349	2	0.0408	0.01938	0.001275
13.3945	2	0.004845	0.00306	-0.003315
13.4401	2	0.00306	0.01173	0.00357
13.4856	2	0.004335	0.009435	0.004845
13.5312	2	0	0	0
13.5768	2	0.00918	0.00408	0.00102
13.6223	2	0.00357	0.001785	-0.00102
13.6679	2	0.00408	0.01938	-0.000255
13.7134	2	-0.00408	0.015555	0.004845
13.759	2	0.000255	0.03723	0.001275
13.8046	2	-0.006375	0.062985	0.00408
13.8501	2	-0.00663	0.062985	0.00816
13.8957	2	-0.015555	0.09945	-0.00102
13.9412	2	-0.02142	0.118065	-0.00867
13.9868	2	-0.027285	0.13719	-0.004845
14.0324	2	-0.03519	0.168555	-0.00051
14.0779	2	-0.040545	0.190485	0.001785
14.1235	2	-0.05661	0.233835	0.011475
14.169	2	-0.059925	0.2499	0.016575
14.2146	2	-0.06732	0.286365	0.016575
14.2602	2	-0.06681	0.309825	0.012495
14.3057	2	-0.072675	0.32742	0.013005
14.3513	2	-0.0765	0.34782	0.00918
14.3968	2	-0.08109	0.3621	0.0051
14.4424	2	-0.0918	0.39627	-0.00102
14.488	2	-0.0918	0.4335	-0.003825
14.5335	2	-0.080835	0.44778	-0.00306
14.5791	2	-0.068085	0.457725	-0.003825
14.6246	2	-0.064005	0.48858	-0.00357
14.6702	2	-0.057375	0.520455	-0.000765
14.7158	2	-0.057885	0.553095	0.00306
14.7613	2	-0.057885	0.58599	0.00051
14.8069	2	-0.062985	0.628065	0.00153
14.8524	2	-0.07089	0.66351	0.00204
14.898	2	-0.07701	0.700485	0.00255
14.9436	2	-0.055845	0.740265	0.006885
14.9891	2	-0.06426	0.77112	0.006375
15.0347	2	-0.06273	0.811155	0.002805
15.0802	2	-0.01428	0.865725	-0.002295
15.1258	2	-0.018105	0.916725	-0.00255
15.1713	2	-0.01989	0.966195	0.008925
15.2169	2	-0.020655	1.02102	0.01122
15.2625	2	-0.01326	1.079415	0.013005
15.308	2	-0.01326	1.130925	0.011475
15.3536	2	-0.028305	1.18422	0.013515
15.3991	2	-0.026775	1.24338	0.00612
15.4447	2	-0.03927	1.295145	0.019125
15.4903	2	-0.0408	1.35354	0.0204
15.5358	2	-0.0408	1.413465	0.028815
15.5814	2	-0.02703	1.46166	0.020145
15.6269	2	-0.028305	1.520055	0.03162
15.6725	2	-0.018615	1.576665	0.03672
15.7181	2	-0.01377	1.629705	0.03672
15.7636	2	-0.00816	1.677645	0.051255
15.8092	2	-0.000765	1.73706	0.05457
15.8547	2	0.003315	1.80795	0.071655
15.9003	2	0.0051	1.87578	0.08313
15.9459	2	0.007905	1.938765	0.081855
15.9914	2	0.01428	2.014245	0.088485
16.037	2	0.02601	2.064225	0.098175
16.0825	2	0.016575	2.1369	0.104295
16.1281	2	0.01479	2.2083	0.11373
16.1737	2	0.02091	2.28276	0.129795
16.2192	2	0	2.35161	0.14586
16.2648	2	-0.00051	2.439585	0.14637
16.3103	2	-0.003825	2.5092	0.16065
16.3559	2	0.00459	2.608395	0.17595
16.4015	2	0.00969	2.679795	0.19482
16.447	2	0.0102	2.75706	0.203745
16.4926	2	-0.00918	2.8407	0.228225
16.5381	2	-0.020145	2.895525	0.23358
16.5837	2	-0.017595	2.988345	0.25602
16.6293	2	-0.016575	3.0396	0.280755
16.6748	2	-0.035955	3.13701	0.300645
16.7204	2	-0.04182	3.21657	0.30855
16.7659	2	-0.03417	3.302505	0.309315
16.8115	2	-0.028305	3.359625	0.312375
16.8571	2	-0.029835	3.431535	0.32844
16.9026	2	-0.01734	3.520785	0.333795
16.9482	2	-0.02091	3.614115	0.35037
16.9937	2	-0.00867	3.692145	0.35496
17.0393	2	-0.01122	3.774765	0.36261
17.0849	2	0.00204	3.85101	0.376125
17.1304	2	0.008925	3.926235	0.381735
17.176	2	0.0102	4.004265	0.396525
17.2215	2	0.02907	4.096065	0.408
17.2671	2	0.045645	4.18863	0.41565
17.3127	2	0.08109	4.29675	0.42789
17.3582	2	0.10404	4.40487	0.442425
17.4038	2	0.11628	4.50228	0.45951
17.4493	2	0.143565	4.579035	0.479655
17.4949	2	0.15351	4.670835	0.49725
17.5404	2	0.15759	4.78278	0.514335
17.586	2	0.168045	4.897275	0.53754
17.6316	2	0.175185	4.991625	0.56457
17.6771	2	0.189465	5.09133	0.58446
17.7227	2	0.19839	5.193585	0.60384
17.7682	2	0.212415	5.31522	0.64158
17.8138	2	0.220065	5.435325	0.66861
17.8594	2	0.238425	5.52891	0.696915
17.9049	2	0.243015	5.64468	0.720885
17.9505	2	0.26571	5.721435	0.73491
17.996	2	0.26775	5.814255	0.743325
18.0416	2	0.273105	5.91804	0.75888
18.0872	2	0.29529	6.01035	0.766785
18.1327	2	0.292995	6.12051	0.77979
18.1783	2	0.29376	6.206955	0.79152
18.2238	2	0.31008	6.29646	0.816
18.2694	2	0.31926	6.383415	0.82824
18.315	2	0.370005	6.482865	0.831555
18.3605	2	0.378165	6.583845	0.84405
18.4061	2	0.408765	6.664935	0.84762
18.4516	2	0.43146	6.771525	0.873885
18.4972	2	0.449565	6.886275	0.88434
18.5428	2	0.493425	6.981645	0.904995
18.5883	2	0.48756	7.109145	0.934065
18.6339	2	0.503625	7.211145	0.95115
18.6794	2	0.52734	7.31544	0.987615
18.725	2	0.531675	7.42458	1.02408
18.7706	2	0.53907	7.51485	1.05774
18.8161	2	0.55182	7.64031	1.06947
18.8617	2	0.563295	7.73568	1.09854
18.9072	2	0.581145	7.85298	1.131435
18.9528	2	0.621945	7.952175	1.15209
18.9984	2	0.621435	8.063865	1.18422
19.0439	2	0.6222	8.201565	1.222725
19.0895	2	0.62934	8.30688	1.23318
19.135	2	0.62781	8.420865	1.253325
19.1806	2	0.656625	8.507565	1.272195
19.2262	2	0.676515	8.60829	1.293615
19.2717	2	0.68544	8.697285	1.311465
19.3173	2	0.73236	8.783985	1.335435
19.3628	2	0.75225	8.877315	1.35252
19.4084	2	0.776985	8.98467	1.37598
19.454	2	0.816	9.075195	1.400715
19.4995	2	0.845325	9.174135	1.408875
19.5451	2	0.849915	9.27792	1.445085
19.5906	2	0.85884	9.36717	1.474155
19.6362	2	0.891225	9.449535	1.488435
19.6818	2	0.901935	9.54108	1.49787
19.7273	2	0.922335	9.657105	1.519035
19.7729	2	0.95472	9.746355	1.559835
19.8184	2	0.970785	9.860595	1.58253
19.864	2	0.97665	9.93225	1.610835
19.9095	2	0.986595	10.0215	1.63761
19.9551	2	1.00317	10.122225	1.65546
20.0007	2	1.02459	10.22295	1.68045
20.0462	2	1.06437	10.285935	1.706715
20.0918	2	1.073295	10.375185	1.72992
20.1373	2	1.074315	10.464435	1.75389
20.1829	2	1.049325	10.551645	1.778115
20.2285	2	1.099815	10.65237	1.80438
20.274	2	1.101855	10.72632	1.82529
20.3196	2	1.106445	10.81914	1.84263
20.3651	2	1.1475	10.902525	1.865325
20.4107	2	1.142145	10.960665	1.879095
20.4563	2	1.17759	11.050425	1.900005
20.5018	2	1.20615	11.11596	1.916325
20.5474	2	1.250775	11.199855	1.950495
20.5929	2	1.27194	11.25978	1.983645
20.6385	2	1.29693	11.338575	2.00787
20.6841	2	1.29744	11.44185	2.02776
20.7296	2	1.33926	11.5005	2.05326
20.7752	2	1.356855	11.59077	2.080545
20.8207	2	1.357365	11.657325	2.102475
20.8663	2	1.369605	11.7351	2.127975
20.9119	2	1.394595	11.79732	2.16597
20.9574	2	1.44126	11.868465	2.185095
21.003	2	1.474155	11.93145	2.212125
21.0485	2	1.50195	11.99673	2.23737
21.0941	2	1.53102	12.059205	2.263125
21.1397	2	1.52847	12.11097	2.28684
21.1852	2	1.536375	12.17217	2.312595
21.2308	2	1.543515	12.25989	2.33733
21.2763	2	1.545045	12.30732	2.3613
21.3219	2	1.57896	12.346335	2.376345
21.3675	2	1.606755	12.41901	2.40822
21.413	2	1.59273	12.48684	2.43321
21.4586	2	1.622055	12.534525	2.451315
21.5041	2	1.616955	12.57711	2.47605
21.5497	2	1.640415	12.60924	2.489565
21.5953	2	1.646025	12.654885	2.513535
21.6408	2	1.68708	12.70104	2.53062
21.6864	2	1.70085	12.75408	2.553825
21.7319	2	1.708245	12.78978	2.58468
21.7775	2	1.742925	12.818595	2.60406
21.8231	2	1.770465	12.879795	2.62701
21.8686	2	1.790865	12.92442	2.64996
21.9142	2	1.798005	12.96828	2.677755
21.9597	2	1.80489	13.01061	2.692545
22.0053	2	1.8411	13.033815	2.71167
22.0508	2	1.876545	13.086855	2.726715
22.0964	2	1.861245	13.10445	2.7693
22.142	2	1.867875	13.14882	2.801685
22.1875	2	1.894905	13.167945	2.830755
22.2331	2	1.89516	13.21257	2.86518
22.2786	2	1.900005	13.259235	2.88456
22.3242	2	1.938255	13.285245	2.905725
22.3698	2	1.94514	13.30743	2.92179
22.4153	2	1.95789	13.337775	2.94984
22.4609	2	1.939275	13.33956	2.958255
22.5064	2	1.960695	13.37067	2.97687
22.552	2	1.95483	13.40688	2.993445
22.5976	2	1.980585	13.444365	3.009255
22.6431	2	2.0196	13.46502	3.02787
22.6887	2	2.01756	13.482105	3.039855
22.7342	2	2.031585	13.513215	3.057705
22.7798	2	2.06601	13.52622	3.087285
22.8254	2	2.0961	13.54815	3.105135
22.8709	2	2.100945	13.562685	3.13344
22.9165	2	2.157555	13.574925	3.1518
22.962	2	2.189685	13.593795	3.177045
23.0076	2	2.20575	13.603485	3.19005
23.0532	2	2.26236	13.614705	3.21657
23.0987	2	2.267205	13.591755	3.23391
23.1443	2	2.27001	13.59762	3.25431
23.1898	2	2.26338	13.59864	3.264
23.2354	2	2.274855	13.62057	3.281595
23.281	2	2.28837	13.61904	3.30378
23.3265	2	2.29806	13.61343	3.3201
23.3721	2	2.34396	13.625415	3.33183
23.4176	2	2.346	13.62006	3.32928
23.4632	2	2.374815	13.6323	3.339225
23.5088	2	2.40567	13.62873	3.35121
23.5543	2	2.40465	13.614705	3.37467
23.5999	2	2.41944	13.6272	3.39864
23.6454	2	2.444175	13.641225	3.422355
23.691	2	2.48421	13.6476	3.440715
23.7366	2	2.52246	13.640715	3.45984
23.7821	2	2.5653	13.6272	3.475395
23.8277	2	2.598705	13.623885	3.492735
23.8732	2	2.62854	13.619295	3.52308
23.9188	2	2.629305	13.614705	3.5394
23.9644	2	2.632365	13.608585	3.56184
24.0099	2	2.633895	13.62108	3.5904
24.0555	2	2.627265	13.614195	3.61845
24.101	2	2.649195	13.61445	3.641145
24.1466	2	2.624205	13.6068	3.670215
24.1922	2	2.60763	13.60578	3.692655
24.2377	2	2.60916	13.59405	3.70923
24.2833	2	2.56479	13.586145	3.725295
24.3288	2	2.56989	13.565745	3.7434
24.3744	2	2.57193	13.541265	3.78369
24.4199	2	2.571165	13.50021	3.795165
24.4655	2	2.57601	13.49103	3.80256
24.5111	2	2.587485	13.4895	3.809445
24.5566	2	2.583915	13.47981	3.815055
24.6022	2	2.598195	13.478025	3.82551
24.6477	2	2.620125	13.4487	3.82653
24.6933	2	2.604825	13.443345	3.84132
24.7389	2	2.6214	13.407645	3.85662
24.7844	2	2.64384	13.39107	3.863505
24.83	2	2.675205	13.385715	3.888495
24.8755	2	2.67852	13.356135	3.893595
24.9211	2	2.665515	13.330635	3.902265
24.9667	2	2.70147	13.276575	3.91731
25.0122	2	2.74788	13.249545	3.926745
25.0578	2	2.77185	13.224555	3.93363
25.1033	2	2.794545	13.213845	3.950715
25.1489	2	2.755275	13.201605	3.97443
25.1945	2	2.757315	13.178145	3.98718
25.24	2	2.759865	13.17381	4.0239
25.2856	2	2.76267	13.15035	4.02747
25.3311	2	2.77644	13.110315	4.05297
25.3767	2	2.75043	13.09476	4.069545
25.4223	2	2.764965	13.05294	4.071585
25.4678	2	2.74635	12.997605	4.083825
25.5134	2	2.721615	12.955275	4.08765
25.5589	2	2.75502	12.92493	4.089435
25.6045	2	2.75706	12.904275	4.09377
25.6501	2	2.785875	12.86067	4.10295
25.6956	2	2.78766	12.837465	4.106265
25.7412	2	2.76981	12.809415	4.11111
25.7867	2	2.768025	12.78315	4.133295
25.8323	2	2.77338	12.74796	4.138395
25.8779	2	2.774145	12.709965	4.14426
25.9234	2	2.797095	12.692115	4.16619
25.969	2	2.802705	12.63321	4.182255
26.0145	2	2.82285	12.616635	4.186845
26.0601	2	2.837895	12.58476	4.19526
26.1057	2	2.838405	12.554415	4.20495
26.1512	2	2.80551	12.51234	4.21311
26.1968	2	2.78817	12.462615	4.218975
26.2423	2	2.79735	12.41544	4.224075
26.2879	2	2.795565	12.386115	4.23759
26.3335	2	2.778225	12.34863	4.250085
26.379	2	2.806275	12.29814	4.24779
26.4246	2	2.828715	12.258105	4.25697
26.4701	2	2.802195	12.23745	4.27482
26.5157	2	2.840445	12.211695	4.28553
26.5613	2	2.82846	12.170385	4.289355
26.6068	2	2.82999	12.133155	4.27482
26.6524	2	2.831775	12.090315	4.2789
26.6979	2	2.83662	12.070425	4.286295
26.7435	2	2.83815	12.027075	4.294965
26.789	2	2.83152	11.97684	4.307715
26.8346	2	2.81418	11.931195	4.320465
26.8802	2	2.789955	11.915895	4.320465
26.9257	2	2.789445	11.88096	4.32021
26.9713	2	2.812905	11.84322	4.31205
27.0168	2	2.83509	11.823585	4.317915
27.0624	2	2.824125	11.765955	4.332705
27.108	2	2.829225	11.735355	4.338315
27.1535	2	2.855235	11.68818	4.346985
27.1991	2	2.82489	11.656815	4.367895
27.2446	2	2.853195	11.633865	4.39212
27.2902	2	2.85498	11.57445	4.397985
27.3358	2	2.834325	11.53416	4.40589
27.3813	2	2.805255	11.480355	4.402575
27.4269	2	2.81112	11.459445	4.399005
27.4724	2	2.801685	11.41125	4.40385
27.518	2	2.796075	11.350815	4.417875
27.5636	2	2.785365	11.31537	4.42017
27.6091	2	2.773635	11.25774	4.42578
27.6547	2	2.78919	11.221785	4.429605
27.7002	2	2.782305	11.180985	4.442865
27.7458	2	2.79174	11.14452	4.43649
27.7914	2	2.76012	11.093775	4.43139
27.8369	2	2.757825	11.056035	4.42578
27.8825	2	2.77236	11.018805	4.426035
27.928	2	2.74482	10.97112	4.428075
27.9736	2	2.781795	10.935165	4.436235
28.0192	2	2.74737	10.884165	4.447455
28.0647	2	2.75706	10.81506	4.442355
28.1103	2	2.769555	10.77528	4.447455
28.1558	2	2.758335	10.75437	4.462245
28.2014	2	2.724165	10.701585	4.47525
28.247	2	2.744055	10.66308	4.483155
28.2925	2	2.733855	10.620495	4.492845
28.3381	2	2.76624	10.566945	4.495395
28.3836	2	2.74023	10.53915	4.50024
28.4292	2	2.747115	10.48662	4.50789
28.4748	2	2.724675	10.43715	4.509675
28.5203	2	2.722635	10.384875	4.51197
28.5659	2	2.71983	10.34382	4.50279
28.6114	2	2.701215	10.308375	4.512735
28.657	2	2.68566	10.243605	4.506615
28.7026	2	2.696115	10.200765	4.50534
28.7481	2	2.67291	10.144665	4.50687
28.7937	2	2.666535	10.09137	4.51809
28.8392	2	2.6367	10.04649	4.513245
28.8848	2	2.608905	9.964125	4.52676
28.9304	2	2.61579	9.931485	4.51095
28.9759	2	2.61222	9.867225	4.49922
29.0215	2	2.58468	9.79914	4.48341
29.067	2	2.584425	9.718305	4.46199
29.1126	2	2.58111	9.625995	4.445925
29.1581	2	2.581875	9.558675	4.433685
29.2037	2	2.57703	9.486765	4.41864
29.2493	2	2.56632	9.413325	4.398495
29.2948	2	2.58774	9.36717	4.391865
29.3404	2	2.56275	9.292965	4.387785
29.3859	2	2.56479	9.207795	4.381665
29.4315	2	2.57754	9.12798	4.36866
29.4771	2	2.536995	9.06066	4.36509
29.5226	2	2.567085	9.002775	4.35744
29.5682	2	2.55153	8.91939	4.340865
29.6137	2	2.51736	8.863545	4.3197
29.6593	2	2.48166	8.78832	4.31052
29.7049	2	2.472225	8.71488	4.287315
29.7504	2	2.4225	8.63583	4.262325
29.796	2	2.390115	8.5578	4.24014
29.8415	2	2.36793	8.49048	4.222035
29.8871	2	2.33325	8.424435	4.19373
29.9327	2	2.33733	8.36451	4.182255
29.9782	2	2.32356	8.275515	4.16517
30.0238	2	2.316165	8.204625	4.150635
30.0693	2	2.295255	8.119965	4.131765
30.1149	2	2.271795	8.04933	4.12029
30.1605	2	2.267205	7.983285	4.090455
30.206	2	2.226405	7.89939	4.08
30.2516	2	2.218245	7.816005	4.05705
30.2971	2	2.18994	7.73211	4.03257
30.3427	2	2.15424	7.657395	4.024665
30.3883	2	2.154495	7.584465	3.994575
30.4338	2	2.132565	7.490625	3.968565
30.4794	2	2.103495	7.417185	3.945615
30.5249	2	2.06244	7.329465	3.92088
30.5705	2	2.032605	7.254495	3.889515
30.6161	0	1.991295	7.172385	3.856365
30.6616	0	1.95534	7.07982	3.832395
30.7072	0	1.917345	6.984195	3.79491
30.7527	0	1.902555	6.88908	3.77655
30.7983	0	1.886745	6.817425	3.75513
30.8439	0	1.87782	6.7473	3.71841
30.8894	0	1.878585	6.66774	3.68271
30.935	0	1.84008	6.59277	3.65211
30.9805	0	1.82937	6.508875	3.6006
31.0261	0	1.815855	6.412995	3.57561
31.0717	0	1.796475	6.3138	3.56031
31.1172	0	1.819935	6.23679	3.518235
31.1628	0	1.801575	6.169215	3.491715
31.2083	0	1.796985	6.0792	3.44403
31.2539	0	1.759755	6.01086	3.41241
31.2994	0	1.740885	5.932065	3.383085
31.345	0	1.71615	5.850975	3.368295
31.3906	0	1.70544	5.76096	3.33489
31.4361	0	1.682235	5.670945	3.297915
31.4817	0	1.65036	5.598525	3.274965
31.5272	0	1.64271	5.508255	3.23391
31.5728	0	1.61925	5.43252	3.192855
31.6184	0	1.58508	5.347605	3.16557
31.6639	0	1.54836	5.264985	3.15027
31.7095	0	1.528725	5.177775	3.11865
31.755	0	1.521075	5.09541	3.095445
31.8006	0	1.478235	5.03217	3.062805
31.8462	0	1.406835	4.951335	3.033735
31.8917	0	1.377765	4.86387	3.005685
31.9373	0	1.339515	4.774875	2.97381
31.9828	0	1.335435	4.68078	2.94576
32.0284	0	1.323705	4.600965	2.921025
32.074	0	1.28877	4.4982	2.88711
32.1195	0	1.261485	4.413285	2.86008
32.1651	0	1.227315	4.34061	2.818005
32.2106	0	1.214565	4.244475	2.78664
32.2562	0	1.1985	4.17894	2.75298
32.3018	0	1.19748	4.117995	2.72646
32.3473	0	1.18983	4.05093	2.69739
32.3929	0	1.15311	3.97086	2.66934
32.4384	0	1.14189	3.904305	2.639505
32.484	0	1.09599	3.837495	2.608905
32.5296	0	1.08528	3.752835	2.59437
32.5751	0	1.086555	3.6669	2.56479
32.6207	0	1.041165	3.594225	2.532405
32.6662	0	1.03479	3.518745	2.50614
32.7118	0	1.023315	3.438675	2.47707
32.7574	0	0.989655	3.364725	2.45106
32.8029	0	0.975375	3.298935	2.419185
32.8485	0	0.93636	3.200505	2.39904
32.894	0	0.896835	3.128595	2.37711
32.9396	0	0.878475	3.062295	2.34804
32.9852	0	0.87159	2.9988	2.321265
33.0307	0	0.871335	2.9427	2.301375
33.0763	0	0.82518	2.87334	2.281995
33.1218	0	0.788205	2.79837	2.25114
33.1674	0	0.77571	2.72289	2.21952
33.213	0	0.744345	2.65659	2.19402
33.2585	0	0.71604	2.58672	2.15424
33.3041	0	0.69921	2.510985	2.121345
33.3496	0	0.666825	2.449275	2.094315
33.3952	0	0.659685	2.375835	2.06448
33.4408	0	0.620925	2.31591	2.034645
33.4863	0	0.614295	2.2338	2.014245
33.5319	0	0.60282	2.17515	1.99002
33.5774	0	0.589815	2.107065	1.96095
33.623	0	0.57732	2.041275	1.93443
33.6685	0	0.577575	1.97115	1.904595
33.7141	0	0.57528	1.891335	1.872465
33.7597	0	0.567375	1.828605	1.845945
33.8052	0	0.549525	1.75593	1.82019
33.8508	0	0.544935	1.689885	1.792905
33.8963	0	0.531165	1.625625	1.75899
33.9419	0	0.522495	1.53459	1.73145
33.9875	0	0.492915	1.4739	1.70238
34.033	0	0.48705	1.403265	1.667445
34.0786	0	0.46002	1.34487	1.631745
34.1241	0	0.42789	1.304325	1.609305
34.1697	0	0.415905	1.2342	1.58712
34.2153	0	0.40902	1.19442	1.55652
34.2608	0	0.3774	1.127355	1.52694
34.3064	0	0.370515	1.066665	1.494555
34.3519	0	0.37383	0.99654	1.47084
34.3975	0	0.349605	0.938655	1.44993
34.4431	0	0.34323	0.887145	1.42188
34.4886	0	0.329205	0.816	1.38822
34.5342	0	0.32742	0.738225	1.349715
34.5797	0	0.28662	0.68136	1.320645
34.6253	0	0.27744	0.63291	1.29795
34.6709	0	0.240975	0.580125	1.282905
34.7164	0	0.201195	0.51714	1.258935
34.762	0	0.19533	0.449055	1.234965
34.8075	0	0.14994	0.392445	1.204365
34.8531	0	0.175695	0.361845	1.16637
34.8987	0	0.158355	0.31416	1.140615
34.9442	0	0.15045	0.24531	1.109505
34.9898	0	0.124185	0.16065	1.07355
35.0353	0	0.121635	0.1122	1.029945
35.0809	0	0.09843	0.045135	0.995775
35.1265	0	0.079815	-0.008925	0.96696
35.172	0	0.04335	-0.05151	0.93432
35.2176	0	0.00816	-0.119085	0.91341
35.2631	0	0.00153	-0.16881	0.87669
35.3087	0	-0.009435	-0.227715	0.848895
35.3543	0	-0.0153	-0.28152	0.825435
35.3998	0	-0.024735	-0.33762	0.80223
35.4454	0	-0.036465	-0.40749	0.77061
35.4909	0	-0.051	-0.43962	0.752505
35.5365	0	-0.07752	-0.482715	0.7293
35.5821	0	-0.08415	-0.532185	0.705585
35.6276	0	-0.08925	-0.583695	0.677025
35.6732	0	-0.09384	-0.622455	0.65892
35.7187	0	-0.11271	-0.65484	0.63036
35.7643	0	-0.11832	-0.6936	0.60843
35.8099	0	-0.124695	-0.718335	0.58446
35.8554	0	-0.12393	-0.732105	0.56406
35.901	0	-0.126735	-0.75072	0.55539
35.9465	0	-0.136425	-0.753015	0.54315
35.9921	0	-0.166005	-0.781065	0.52683
36.0376	0	-0.16983	-0.79662	0.514845
36.0832	0	-0.17901	-0.814215	0.496995
36.1288	0	-0.167535	-0.823395	0.487815
36.1743	0	-0.166005	-0.848895	0.4692
36.2199	0	-0.17544	-0.85833	0.44778
36.2654	0	-0.21369	-0.868275	0.43554
36.311	0	-0.217005	-0.88179	0.410295
36.3566	0	-0.25398	-0.895815	0.39168
36.4021	0	-0.256275	-0.908055	0.3825
36.4477	0	-0.274125	-0.93075	0.364395
36.4932	0	-0.260355	-0.969255	0.357
36.5388	0	-0.261885	-0.98175	0.35292
36.5844	0	-0.25245	-0.992205	0.35751
36.6299	0	-0.250665	-0.990675	0.357765
36.6755	0	-0.249135	-1.008015	0.365925
36.721	0	-0.24939	-1.01031	0.35853
36.7666	0	-0.25806	-1.006485	0.34884
36.8122	0	-0.25602	-0.991695	0.34221
36.8577	0	-0.25347	-1.000875	0.33864
36.9033	0	-0.2499	-0.988635	0.331245
36.9488	0	-0.240975	-0.99348	0.31824
36.9944	0	-0.241485	-0.992715	0.308805
37.04	0	-0.238425	-0.95727	0.301155
37.0855	0	-0.234345	-0.941715	0.305745
37.1311	0	-0.22848	-0.92667	0.301155
37.1766	0	-0.220575	-0.920295	0.290955
37.2222	0	-0.225165	-0.903975	0.292485
37.2678	0	-0.224655	-0.892245	0.294525
37.3133	0	-0.223635	-0.886635	0.293505
37.3589	0	-0.2193	-0.870825	0.298095
37.4044	0	-0.22236	-0.877965	0.306255
37.45	0	-0.22389	-0.85272	0.328695
37.4956	0	-0.231285	-0.82977	0.331245
37.5411	0	-0.22695	-0.8007	0.34017
37.5867	0	-0.220575	-0.775965	0.336855
37.6322	0	-0.208845	-0.77469	0.33405
37.6778	0	-0.16932	-0.775455	0.34017
37.7234	0	-0.179775	-0.761685	0.340935
37.7689	0	-0.174165	-0.754035	0.34935
37.8145	0	-0.173145	-0.75276	0.35496
37.86	0	-0.17544	-0.73491	0.354195
37.9056	0	-0.161415	-0.698955	0.352155
37.9512	0	-0.159885	-0.678045	0.36516
37.9967	0	-0.14841	-0.652545	0.367455
38.0423	0	-0.155295	-0.637755	0.3672
38.0878	0	-0.12342	-0.627045	0.370515
38.1334	0	-0.113475	-0.613785	0.376125
38.179	0	-0.10455	-0.604605	0.37689
38.2245	0	-0.09996	-0.577065	0.396525
38.2701	0	-0.09435	-0.55437	0.405195
38.3156	0	-0.091035	-0.538305	0.41667
38.3612	0	-0.080325	-0.51408	0.425595
38.4067	0	-0.07854	-0.473535	0.43095
38.4523	0	-0.074715	-0.43911	0.442425
38.4979	0	-0.080835	-0.40749	0.43911
38.5434	0	-0.073185	-0.3927	0.45339
38.589	0	-0.07038	-0.36516	0.45492
38.6345	0	-0.06987	-0.343995	0.46665
38.6801	0	-0.04233	-0.307785	0.47634
38.7257	0	-0.049725	-0.27948	0.48807
38.7712	0	-0.03978	-0.27642	0.496995
38.8168	0	-0.03774	-0.24123	0.492405
38.8623	0	-0.03264	-0.22032	0.488325
38.9079	0	-0.031875	-0.187425	0.48552
38.9535	0	-0.023205	-0.155805	0.494955
38.999	0	-0.022695	-0.13107	0.50592
39.0446	0	-0.020655	-0.104805	0.514845
39.0901	0	-0.013005	-0.096645	0.527085
39.1357	0	-0.01275	-0.076245	0.53346
39.1813	0	-0.003825	-0.05763	0.539835
39.2268	0	-0.00663	-0.044625	0.5457
39.2724	0	-0.00459	-0.01632	0.5508
39.3179	0	-0.00459	-0.004335	0.55743
39.3635	0	-0.034935	0.023715	0.554115
39.4091	0	-0.037995	0.0459	0.559725
39.4546	0	-0.03213	0.061455	0.561255
39.5002	0	-0.02805	0.08058	0.56712
39.5457	0	-0.021165	0.110925	0.561765
39.5913	0	-0.01683	0.125205	0.573495
39.6369	0	-0.013005	0.156825	0.579105
39.6824	0	-0.01632	0.200175	0.55335
39.728	0	-0.03927	0.197115	0.549015
39.7735	0	-0.032895	0.207315	0.55386
39.8191	0	-0.04029	0.232815	0.55437
39.8647	0	-0.051	0.254745	0.54723
39.9102	0	-0.04539	0.272595	0.547485
39.9558	0	-0.043095	0.296565	0.543915
40.0013	0	-0.03315	0.30702	0.545955
40.0469	0	-0.04233	0.32793	0.556665
40.0925	0	-0.045135	0.351135	0.56763
40.138	0	-0.0306	0.37332	0.56253
40.1836	0	-0.031365	0.373065	0.56712
40.2291	0	-0.026775	0.392955	0.5763
40.2747	0	-0.02397	0.406725	0.58599
40.3203	0	-0.0357	0.4437	0.586755
40.3658	0	-0.037485	0.447525	0.59109
40.4114	0	-0.04182	0.48297	0.60129
40.4569	0	-0.03519	0.495975	0.60231
40.5025	0	-0.03468	0.51765	0.60639
40.548	0	-0.053805	0.538305	0.612765
40.5936	0	-0.055335	0.5559	0.62067
40.6392	0	-0.05967	0.57528	0.630105
40.6847	0	-0.058395	0.60639	0.62781
40.7303	0	-0.077265	0.639795	0.62271
40.7758	0	-0.07599	0.694365	0.61965
40.8214	0	-0.116025	0.71451	0.61506
40.867	0	-0.117045	0.730065	0.61965
40.9125	0	-0.12393	0.751485	0.62577
40.9581	0	-0.134895	0.75582	0.62373
41.0036	0	-0.123165	0.764745	0.60945
41.0492	0	-0.123165	0.78132	0.605625
41.0948	0	-0.126225	0.78693	0.615315
41.1403	0	-0.133875	0.800445	0.61251
41.1859	0	-0.13566	0.814215	0.613785
41.2314	0	-0.164985	0.81702	0.611235
41.277	0	-0.1683	0.837165	0.607155
41.3226	0	-0.17442	0.84762	0.61506
41.3681	0	-0.173145	0.872865	0.623475
41.4137	0	-0.16422	0.883065	0.623475
41.4592	0	-0.158865	0.88383	0.63597
41.5048	0	-0.1581	0.896835	0.629085
41.5504	0	-0.15759	0.90831	0.62322
41.5959	0	-0.16167	0.936615	0.621945
41.6415	0	-0.15555	0.955995	0.62985
41.687	0	-0.15963	0.9537	0.633165
41.7326	0	-0.152235	0.9741	0.64566
41.7782	0	-0.155805	0.995265	0.65331
41.8237	0	-0.155805	1.01031	0.66351
41.8693	0	-0.15606	1.02969	0.667335
41.9148	0	-0.16473	1.05264	0.68034
41.9604	0	-0.17391	1.067685	0.687735
42.006	0	-0.169575	1.05519	0.70227
42.0515	0	-0.14535	1.086555	0.705075
42.0971	0	-0.15198	1.09956	0.709155
42.1426	0	-0.16269	1.10517	0.717825
42.1882	0	-0.163965	1.12608	0.714255
42.2338	0	-0.162435	1.140105	0.71349
42.2793	0	-0.148155	1.168665	0.72369
42.3249	0	-0.14637	1.16484	0.71961
42.3704	0	-0.147135	1.170705	0.72318
42.416	0	-0.13719	1.163565	0.72369
42.4616	0	-0.170085	1.170195	0.729555
42.5071	0	-0.17493	1.19799	0.72675
42.5527	0	-0.166515	1.2138	0.72879
42.5982	0	-0.17034	1.225785	0.728025
42.6438	0	-0.16932	1.235475	0.727005
42.6894	0	-0.17391	1.24134	0.730575
42.7349	0	-0.17799	1.25256	0.732615
42.7805	0	-0.17595	1.2444	0.73338
42.826	0	-0.17901	1.26939	0.747405
42.8716	0	-0.183855	1.274235	0.758625
42.9171	0	-0.18513	1.27959	0.765255
42.9627	0	-0.200685	1.274235	0.759135
43.0083	0	-0.20298	1.28775	0.75735
43.0538	0	-0.20094	1.298715	0.77061
43.0994	0	-0.206295	1.308405	0.781575
43.1449	0	-0.239445	1.316565	0.79254
43.1905	0	-0.233835	1.31784	0.79305
43.2361	0	-0.23613	1.311465	0.794325
43.2816	0	-0.220065	1.31019	0.79866
43.3272	0	-0.240975	1.334925	0.79458
43.3727	0	-0.24633	1.341045	0.79203
43.4183	0	-0.26367	1.349205	0.787695
43.4639	0	-0.268515	1.327275	0.775455
43.5094	0	-0.27081	1.333395	0.75684
43.555	0	-0.274635	1.32396	0.76245
43.6005	0	-0.26775	1.322175	0.766785
43.6461	0	-0.26061	1.31325	0.778515
43.6917	0	-0.257805	1.318095	0.78489
43.7372	0	-0.25704	1.293615	0.787695
43.7828	0	-0.26724	1.308405	0.79713
43.8283	0	-0.27795	1.305855	0.810645
43.8739	0	-0.282795	1.273215	0.804525
43.9195	0	-0.290955	1.2648	0.806565
43.965	0	-0.29835	1.2597	0.812685
44.0106	0	-0.309315	1.277295	0.808605
44.0561	0	-0.31518	1.277295	0.81549
44.1017	0	-0.3213	1.275	0.81396
44.1473	0	-0.322065	1.28418	0.808605
44.1928	0	-0.335325	1.281885	0.8109
44.2384	0	-0.33711	1.3158	0.817275
44.2839	0	-0.339915	1.294125	0.810645
44.3295	0	-0.343485	1.303305	0.809625
44.3751	0	-0.34119	1.305345	0.805545
44.4206	0	-0.338385	1.302795	0.81039
44.4662	0	-0.34935	1.32141	0.815745
44.5117	0	-0.37791	1.30407	0.818295
44.5573	0	-0.37485	1.28163	0.81702
44.6029	0	-0.37383	1.27959	0.80988
44.6484	0	-0.380715	1.282395	0.815745
44.694	0	-0.38148	1.285455	0.813705
44.7395	0	-0.39066	1.272705	0.800445
44.7851	0	-0.39882	1.266075	0.796365
44.8307	0	-0.414375	1.241085	0.7905
44.8762	0	-0.416925	1.254855	0.79815
44.9218	0	-0.422535	1.259955	0.80631
44.9673	0	-0.42075	1.25154	0.803505
45.0129	0	-0.4233	1.249245	0.800955
45.0585	0	-0.42483	1.246695	0.79203
45.104	0	-0.426105	1.232925	0.792795
45.1496	0	-0.460275	1.23267	0.78132
45.1951	0	-0.466395	1.22043	0.78081
45.2407	0	-0.476595	1.1985	0.78285
45.2862	0	-0.47532	1.17861	0.7752
45.3318	0	-0.469455	1.151835	0.76653
45.3774	0	-0.473535	1.179885	0.762195
45.4229	0	-0.480165	1.17249	0.761685
45.4685	0	-0.48705	1.17963	0.751485
45.514	0	-0.491895	1.173255	0.742305
45.5596	0	-0.49011	1.15617	0.74205
45.6052	0	-0.49725	1.173255	0.735165
45.6507	0	-0.497505	1.150815	0.739755
45.6963	0	-0.507705	1.14444	0.744855
45.7418	0	-0.50949	1.1373	0.739755
45.7874	0	-0.515865	1.121745	0.731595
45.833	0	-0.51255	1.11129	0.73287
45.8785	0	-0.514335	1.10415	0.724455
45.9241	0	-0.512805	1.09191	0.72114
45.9696	0	-0.5151	1.08681	0.72114
46.0152	0	-0.52122	1.072785	0.72063
46.0608	0	-0.51765	1.078395	0.72318
46.1063	0	-0.52785	1.056465	0.72726
46.1519	0	-0.517395	1.050345	0.72879
46.1974	0	-0.490875	1.049835	0.710685
46.243	0	-0.51969	1.05417	0.71451
46.2886	0	-0.523515	1.055445	0.70839
46.3341	0	-0.537795	1.040655	0.698955
46.3797	0	-0.542385	1.02408	0.70533
46.4252	0	-0.55539	1.028925	0.70278
46.4708	0	-0.556665	1.00572	0.70635
46.5164	0	-0.55794	1.002915	0.734145
46.5619	0	-0.53907	0.9996	0.732615
46.6075	0	-0.54876	0.991185	0.73593
46.653	0	-0.55029	0.985065	0.732615
46.6986	0	-0.538815	0.962625	0.73899
46.7442	0	-0.544425	0.96645	0.73389
46.7897	0	-0.53703	0.949365	0.747915
46.8353	0	-0.55131	0.95472	0.74562
46.8808	0	-0.547995	0.961095	0.733125
46.9264	0	-0.57681	0.95829	0.746385
46.972	0	-0.586245	0.95217	0.75327
47.0175	0	-0.59772	0.953955	0.74817
47.0631	0	-0.60741	0.943755	0.743325
47.1086	0	-0.607665	0.94248	0.73185
47.1542	0	-0.600015	0.93075	0.724455
47.1998	0	-0.596445	0.924885	0.701505
47.2453	0	-0.601035	0.896835	0.685185
47.2909	0	-0.61608	0.886635	0.671925
47.3364	0	-0.62373	0.89403	0.65535
47.382	0	-0.615315	0.88332	0.652545
47.4276	0	-0.61455	0.87006	0.647955
47.4731	0	-0.611745	0.87312	0.641325
47.5187	0	-0.61659	0.846345	0.633165
47.5642	0	-0.596445	0.83691	0.62934
47.6098	0	-0.605625	0.832575	0.637755
47.6553	0	-0.584205	0.80325	0.638775
47.7009	0	-0.591345	0.78795	0.62883
47.7465	0	-0.59568	0.794325	0.61965
47.792	0	-0.599505	0.80121	0.61506
47.8376	0	-0.61251	0.80988	0.62883
47.8831	0	-0.609705	0.785145	0.627555
47.9287	0	-0.606135	0.78591	0.61455
47.9743	0	-0.60078	0.781065	0.61353
48.0198	0	-0.60792	0.778515	0.604605
48.0654	0	-0.583185	0.781575	0.598485
48.1109	0	-0.58395	0.759135	0.603585
48.1565	0	-0.58242	0.75429	0.60894
48.2021	0	-0.58956	0.74307	0.58803
48.2476	0	-0.60333	0.730065	0.593385
48.2932	0	-0.61149	0.72675	0.5763
48.3387	0	-0.619395	0.707625	0.58089
48.3843	0	-0.62424	0.70278	0.584205
48.4299	0	-0.622965	0.69207	0.581145
48.4754	0	-0.62577	0.69717	0.572985
48.521	0	-0.61812	0.67932	0.569415
48.5665	0	-0.62883	0.664785	0.563805
48.6121	0	-0.62985	0.6579	0.56151
48.6577	0	-0.631125	0.65637	0.55386
48.7032	0	-0.63393	0.64005	0.544935
48.7488	0	-0.63342	0.639285	0.540855
48.7943	0	-0.631125	0.632655	0.532695
48.8399	0	-0.638775	0.64668	0.511275
48.8855	0	-0.63648	0.612255	0.50235
48.931	0	-0.64515	0.601035	0.501585
48.9766	0	-0.63699	0.603075	0.495975
49.0221	0	-0.64107	0.587265	0.49827
49.0677	0	-0.64872	0.582675	0.502095
49.1133	0	-0.66198	0.5916	0.486285
49.1588	0	-0.65841	0.59466	0.490875
49.2044	0	-0.66606	0.590835	0.48399
49.2499	0	-0.684165	0.60843	0.4845
49.2955	0	-0.656115	0.612255	0.4743
49.3411	0	-0.689775	0.5865	0.464865
49.3866	0	-0.69105	0.580635	0.457215
49.4322	0	-0.69156	0.576555	0.45135
49.4777	0	-0.694365	0.550545	0.46053
49.5233	0	-0.69717	0.526575	0.45696
49.5689	0	-0.70125	0.51102	0.457725
49.6144	0	-0.70686	0.502605	0.447525
49.66	0	-0.71451	0.490875	0.427125
49.7055	0	-0.749955	0.48552	0.408
49.7511	0	-0.747405	0.47991	0.398055
49.7967	0	-0.75582	0.47022	0.39984
49.8422	0	-0.758625	0.454155	0.39933
49.8878	0	-0.791265	0.44727	0.393465
49.9333	0	-0.818295	0.428655	0.385815
49.9789	0	-0.77214	0.401115	0.370515
50.0244	0	-0.780555	0.379695	0.36312
50.07	0	-0.778005	0.379185	0.358275
50.1156	0	-0.780045	0.36924	0.35547
50.1611	0	-0.778005	0.359295	0.34731
50.2067	0	-0.76959	0.364905	0.350625
50.2522	0	-0.766275	0.357	0.35598
50.2978	0	-0.772395	0.370005	0.351645
50.3434	0	-0.772905	0.359805	0.351135
50.3889	0	-0.786675	0.337365	0.342975
50.4345	0	-0.80172	0.33303	0.338895
50.48	0	-0.818295	0.327675	0.320025
50.5256	0	-0.820335	0.31314	0.305235
50.5712	0	-0.82212	0.30957	0.30141
50.6167	0	-0.814725	0.29019	0.28713
50.6623	0	-0.808605	0.280245	0.2856
50.7078	0	-0.801975	0.280755	0.280755
50.7534	0	-0.797385	0.26418	0.268005
50.799	0	-0.79458	0.255	0.256785
50.8445	0	-0.795345	0.22389	0.256275
50.8901	0	-0.790755	0.211395	0.243015
50.9356	0	-0.78387	0.196095	0.238425
50.9812	0	-0.8007	0.16881	0.234345
51.0268	0	-0.793815	0.170085	0.22491
51.0723	0	-0.822885	0.15147	0.212415
51.1179	0	-0.817785	0.138465	0.191505
51.1634	0	-0.811155	0.104805	0.179265
51.209	0	-0.81855	0.087975	0.171615
51.2546	0	-0.825435	0.092055	0.15606
51.3001	0	-0.819825	0.069615	0.142545
51.3457	0	-0.834105	0.09384	0.143055
51.3912	0	-0.838185	0.107355	0.142545
51.4368	0	-0.84864	0.109395	0.14433
51.4824	0	-0.839715	0.10608	0.13719
51.5279	0	-0.848385	0.106845	0.136935
51.5735	0	-0.84405	0.108885	0.132345
51.619	0	-0.84456	0.09384	0.125205
51.6646	0	-0.84048	0.091035	0.120105
51.7102	0	-0.865215	0.07344	0.10608
51.7557	0	-0.86445	0.066555	0.09894
51.8013	0	-0.863685	0.058905	0.09741
51.8468	0	-0.869805	0.046665	0.08568
51.8924	0	-0.86751	0.043605	0.082365
51.938	0	-0.867255	0.047685	0.071655
51.9835	0	-0.832575	0.037485	0.07446
52.0291	0	-0.82926	0.04182	0.06273
52.0746	0	-0.82926	0.028815	0.06018
52.1202	0	-0.837675	0.031875	0.06783
52.1657	0	-0.84456	0.03774	0.074715
52.2113	0	-0.837675	-0.00051	0.06375
52.2569	0	-0.8313	-0.02142	0.062985
52.3024	0	-0.82824	-0.04794	0.05916
52.348	0	-0.819825	-0.06783	0.062985
52.3935	0	-0.818295	-0.054315	0.056865
52.4391	0	-0.81294	-0.070635	0.053295
52.4847	0	-0.816765	-0.05559	0.04539
52.5302	0	-0.81141	-0.0714	0.042075
52.5758	0	-0.843795	-0.060945	0.05814
52.6213	0	-0.846855	-0.0612	0.062985
52.6669	0	-0.854505	-0.066555	0.04692
52.7125	0	-0.859095	-0.07038	0.056355
52.758	0	-0.868275	-0.05865	0.049725
52.8036	0	-0.86649	-0.06783	0.037995
52.8491	0	-0.864195	-0.068595	0.03519
52.8947	0	-0.869295	-0.077775	0.026775
52.9403	0	-0.864705	-0.09078	0.011985
52.9858	0	-0.869805	-0.09435	0.002805
53.0314	0	-0.872865	-0.115005	0.02601
53.0769	0	-0.855015	-0.1377	0.02193
53.1225	0	-0.85323	-0.149685	0.01887
53.1681	0	-0.846345	-0.153255	0.017595
53.2136	0	-0.87516	-0.156315	0.024225
53.2592	0	-0.8721	-0.16575	0.01734
53.3047	0	-0.871845	-0.14943	0.007395
53.3503	0	-0.867765	-0.159885	-0.00357
53.3959	0	-0.89709	-0.162435	-0.0102
53.4414	0	-0.89556	-0.166005	-0.02244
53.487	0	-0.88893	-0.17442	-0.019635
53.5325	0	-0.893265	-0.164475	-0.019635
53.5781	0	-0.88944	-0.177225	-0.02244
53.6237	0	-0.9027	-0.177225	-0.035955
53.6692	0	-0.935085	-0.177225	-0.037995
53.7148	0	-0.93228	-0.188445	-0.048195
53.7603	0	-0.89964	-0.204765	-0.08211
53.8059	0	-0.896835	-0.208845	-0.086955
53.8515	0	-0.895815	-0.208335	-0.092055
53.897	0	-0.892245	-0.218025	-0.098685
53.9426	0	-0.892245	-0.224145	-0.102765
53.9881	0	-0.92361	-0.236385	-0.10353
54.0337	0	-0.925905	-0.233325	-0.096645
54.0793	0	-0.92055	-0.22389	-0.10251
54.1248	0	-0.91494	-0.222615	-0.10149
54.1704	0	-0.913665	-0.24072	-0.102765
54.2159	0	-0.91341	-0.239445	-0.11475
54.2615	0	-0.923355	-0.247095	-0.120615
54.3071	0	-0.93585	-0.259335	-0.128775
54.3526	0	-0.93534	-0.26877	-0.12138
54.3982	0	-0.93534	-0.277185	-0.12903
54.4437	0	-0.938145	-0.29121	-0.14229
54.4893	0	-0.921315	-0.28407	-0.14637
54.5348	0	-0.912645	-0.27642	-0.15198
54.5804	0	-0.909075	-0.31926	-0.15912
54.626	0	-0.90882	-0.3468	-0.159885
54.6715	0	-0.94095	-0.362355	-0.16677
54.7171	0	-0.96696	-0.35037	-0.16677
54.7626	0	-0.973845	-0.360825	-0.175185
54.8082	0	-0.976905	-0.34884	-0.17442
54.8538	0	-0.967725	-0.35088	-0.182325
54.8993	0	-0.976395	-0.356745	-0.188445
54.9449	0	-0.98124	-0.355725	-0.192015
54.9904	0	-0.990165	-0.351135	-0.20808
55.036	0	-0.987105	-0.363885	-0.20706
55.0816	0	-0.97002	-0.36006	-0.215985
55.1271	0	-0.969255	-0.359295	-0.21522
55.1727	0	-0.96135	-0.346545	-0.221595
55.2182	0	-0.961605	-0.358785	-0.23307
55.2638	0	-0.989145	-0.351645	-0.234855
55.3094	0	-0.98583	-0.369495	-0.23664
55.3549	0	-0.98838	-0.36567	-0.24276
55.4005	0	-0.978435	-0.379695	-0.255
55.446	0	-0.988635	-0.39729	-0.254745
55.4916	0	-0.99144	-0.403665	-0.25653
55.5372	0	-0.98991	-0.412335	-0.25806
55.5827	0	-0.981495	-0.42228	-0.281265
55.6283	0	-0.977925	-0.43299	-0.28305
55.6738	0	-0.97767	-0.439875	-0.271575
55.7194	0	-0.97257	-0.42483	-0.272595
55.765	0	-0.96747	-0.433245	-0.268005
55.8105	0	-0.97206	-0.43605	-0.280755
55.8561	0	-0.97053	-0.457215	-0.292995
55.9016	0	-0.96339	-0.464355	-0.31059
55.9472	0	-0.964665	-0.4641	-0.31671
55.9928	0	-0.964665	-0.489855	-0.32334
56.0383	0	-0.993735	-0.50184	-0.324105
56.0839	0	-0.992205	-0.50847	-0.329715
56.1294	0	-0.995265	-0.51153	-0.32946
56.175	0	-0.96135	-0.519435	-0.33303
56.2206	0	-0.960075	-0.530145	-0.33762
56.2661	0	-0.96645	-0.534735	-0.341955
56.3117	0	-0.963135	-0.550035	-0.355215
56.3572	0	-0.95676	-0.542895	-0.36108
56.4028	0	-0.95115	-0.52581	-0.37893
56.4484	0	-0.942225	-0.5202	-0.37638
56.4939	0	-0.933045	-0.52377	-0.37332
56.5395	0	-0.89403	-0.52989	-0.373575
56.585	0	-0.89352	-0.541875	-0.36465
56.6306	0	-0.888675	-0.52071	-0.36975
56.6762	0	-0.88944	-0.512805	-0.37026
56.7217	0	-0.84354	-0.516375	-0.377145
56.7673	0	-0.81396	-0.51204	-0.391425
56.8128	0	-0.82671	-0.498015	-0.385305
56.8584	0	-0.816765	-0.488835	-0.38199
56.9039	0	-0.825945	-0.49164	-0.39066
56.9495	0	-0.827985	-0.48603	-0.40137
56.9951	0	-0.828495	-0.487815	-0.392445
57.0406	0	-0.83028	-0.508215	-0.412845
57.0862	0	-0.82416	-0.527085	-0.425595
57.1317	0	-0.853995	-0.538305	-0.426615
57.1773	0	-0.85527	-0.519945	-0.431205
57.2229	0	-0.840735	-0.50337	-0.434265
57.2684	0	-0.835635	-0.520455	-0.430185
57.314	0	-0.836655	-0.51663	-0.437835
57.3595	0	-0.83436	-0.49929	-0.41922
57.4051	0	-0.82314	-0.49113	-0.433245
57.4507	0	-0.82365	-0.48756	-0.43656
57.4962	0	-0.82008	-0.48603	-0.439365
57.5418	0	-0.819315	-0.49164	-0.437835
57.5873	0	-0.81753	-0.47736	-0.425085
57.6329	0	-0.81753	-0.47634	-0.42177
57.6785	0	-0.821355	-0.457215	-0.42993
57.724	0	-0.819315	-0.45849	-0.434265
57.7696	0	-0.817785	-0.453645	-0.438345
57.8151	0	-0.797385	-0.438345	-0.455175
57.8607	0	-0.792795	-0.432735	-0.46053
57.9063	0	-0.76551	-0.437835	-0.4641
57.9518	0	-0.767295	-0.42636	-0.4641
57.9974	0	-0.769335	-0.405195	-0.45696
58.0429	0	-0.76041	-0.39678	-0.45441
58.0885	0	-0.75735	-0.39474	-0.45594
58.1341	0	-0.76041	-0.381225	-0.47175
58.1796	0	-0.755565	-0.409275	-0.493935
58.2252	0	-0.776985	-0.430185	-0.49521
58.2707	0	-0.80988	-0.42738	-0.49674
58.3163	0	-0.81243	-0.435285	-0.49878
58.3619	0	-0.7905	-0.445995	-0.502605
58.4074	0	-0.786165	-0.45288	-0.51051
58.453	0	-0.775965	-0.450075	-0.510255
58.4985	0	-0.76857	-0.4335	-0.503115
58.5441	0	-0.727005	-0.442425	-0.505155
58.5897	0	-0.71961	-0.43911	-0.511785
58.6352	0	-0.72981	-0.441405	-0.51969
58.6808	0	-0.72471	-0.447015	-0.518415
58.7263	0	-0.72267	-0.456705	-0.52071
58.7719	0	-0.717315	-0.46512	-0.52938
58.8175	0	-0.712725	-0.46257	-0.536265
58.863	0	-0.71349	-0.46206	-0.537285
58.9086	0	-0.71196	-0.451605	-0.55029
58.9541	0	-0.703545	-0.45339	-0.56763
58.9997	0	-0.71145	-0.440385	-0.575025
59.0453	0	-0.710685	-0.407745	-0.572475
59.0908	0	-0.712725	-0.388875	-0.571455
59.1364	0	-0.73236	-0.373065	-0.566865
59.1819	0	-0.73848	-0.362355	-0.57018
59.2275	0	-0.74001	-0.37995	-0.580125
59.273	0	-0.74052	-0.379185	-0.586755
59.3186	0	-0.73134	-0.398055	-0.57885
59.3642	0	-0.76551	-0.38505	-0.58752
59.4097	0	-0.732615	-0.39627	-0.602055
59.4553	0	-0.726495	-0.395505	-0.608175
59.5008	0	-0.72267	-0.39372	-0.600015
59.5464	0	-0.718845	-0.38148	-0.613785
59.592	0	-0.704565	-0.38199	-0.619905
59.6375	0	-0.704565	-0.371535	-0.617355
59.6831	0	-0.70635	-0.37434	-0.61965
59.7286	0	-0.69258	-0.379695	-0.61863
59.7742	0	-0.689265	-0.374595	-0.617355
59.8198	0	-0.682635	-0.378675	-0.62067
59.8653	0	-0.68085	-0.372045	-0.635715
59.9109	0	-0.668355	-0.372555	-0.643365
59.9564	0	-0.666315	-0.36159	-0.633675
60.002	0	-0.674475	-0.354705	-0.628065
60.0476	0	-0.66912	-0.359805	-0.645915
60.0931	0	-0.66657	-0.36618	-0.64872
60.1387	0	-0.661725	-0.37944	-0.647955
60.1842	0	-0.66147	-0.368985	-0.64413
60.2298	0	-0.62322	-0.34782	-0.645405
60.2754	0	-0.616845	-0.342975	-0.64209
60.3209	0	-0.620415	-0.32487	-0.65739
60.3665	0	-0.65229	-0.334305	-0.67269
60.412	0	-0.67626	-0.34221	-0.67983
60.4576	0	-0.667845	-0.33966	-0.686205
60.5032	0	-0.658665	-0.34629	-0.693855
60.5487	0	-0.65382	-0.346545	-0.69105
60.5943	0	-0.670905	-0.342975	-0.68136
60.6398	0	-0.667845	-0.338385	-0.68238
60.6854	0	-0.665295	-0.33507	-0.67728
60.731	0	-0.66402	-0.35088	-0.678045
60.7765	0	-0.660195	-0.346545	-0.674475
60.8221	0	-0.634695	-0.3468	-0.67575
60.8676	0	-0.633675	-0.350115	-0.67473
60.9132	0	-0.62934	-0.35292	-0.67014
60.9588	0	-0.620415	-0.35547	-0.664785
61.0043	0	-0.61761	-0.338895	-0.659175
61.0499	0	-0.60792	-0.323595	-0.649485
61.0954	0	-0.60231	-0.31161	-0.64464
61.141	0	-0.606645	-0.301665	-0.641325
61.1866	0	-0.625515	-0.291975	-0.642345
61.2321	0	-0.62016	-0.285855	-0.63597
61.2777	0	-0.61098	-0.290445	-0.632655
61.3232	0	-0.61557	-0.289935	-0.63291
61.3688	0	-0.62271	-0.276675	-0.63342
61.4143	0	-0.618375	-0.26214	-0.635715
61.4599	0	-0.61302	-0.24582	-0.641835
61.5055	0	-0.58497	-0.251175	-0.6375
61.551	0	-0.564825	-0.269535	-0.648975
61.5966	0	-0.55488	-0.26571	-0.64413
61.6421	0	-0.552075	-0.287385	-0.64872
61.6877	0	-0.55182	-0.273105	-0.6426
61.7333	0	-0.537285	-0.27234	-0.632145
61.7788	0	-0.52071	-0.26826	-0.63597
61.8244	0	-0.50898	-0.260865	-0.62628
61.8699	0	-0.508725	-0.24837	-0.612
61.9155	0	-0.51765	-0.24225	-0.607665
61.9611	0	-0.511275	-0.246075	-0.60843
62.0066	0	-0.50286	-0.262905	-0.594405
62.0522	0	-0.50133	-0.255765	-0.586245
62.0977	0	-0.46818	-0.26367	-0.59262
62.1433	0	-0.46767	-0.256275	-0.59466
62.1889	0	-0.462315	-0.257295	-0.58803
62.2344	0	-0.466395	-0.235875	-0.585735
62.28	0	-0.453135	-0.220575	-0.586755
62.3255	0	-0.44778	-0.208845	-0.579105
62.3711	0	-0.44013	-0.20196	-0.574005
62.4167	0	-0.438855	-0.175185	-0.553095
62.4622	0	-0.43248	-0.174675	-0.5661
62.5078	0	-0.424575	-0.1683	-0.572475
62.5533	0	-0.420495	-0.19023	-0.57579
62.5989	0	-0.41055	-0.187425	-0.5814
62.6445	0	-0.40647	-0.19023	-0.56508
62.69	0	-0.399075	-0.183855	-0.563805
62.7356	0	-0.39627	-0.177735	-0.55335
62.7811	0	-0.381735	-0.198135	-0.54825
62.8267	0	-0.372555	-0.18411	-0.52989
62.8723	0	-0.338385	-0.17952	-0.528615
62.9178	0	-0.32895	-0.181815	-0.520965
62.9634	0	-0.326145	-0.176715	-0.52224
63.0089	0	-0.328695	-0.17748	-0.5253
63.0545	0	-0.332265	-0.167025	-0.517395
63.1001	0	-0.324615	-0.16779	-0.515355
63.1456	0	-0.34527	-0.151725	-0.518415
63.1912	0	-0.35139	-0.141525	-0.51408
63.2367	0	-0.34884	-0.151725	-0.50592
63.2823	0	-0.350625	-0.15402	-0.511275
63.3279	0	-0.35241	-0.156315	-0.51051
63.3734	0	-0.354195	-0.164985	-0.50031
63.419	0	-0.352155	-0.156315	-0.504135
63.4645	0	-0.34578	-0.17442	-0.50235
63.5101	0	-0.339915	-0.17799	-0.50388
63.5557	0	-0.34119	-0.166005	-0.49623
63.6012	0	-0.36108	-0.165495	-0.487305
63.6468	0	-0.35598	-0.16626	-0.494445
63.6923	0	-0.345525	-0.174675	-0.493935
63.7379	0	-0.338385	-0.17289	-0.48909
63.7834	0	-0.33456	-0.17493	-0.47124
63.829	0	-0.330225	-0.173145	-0.470475
63.8746	0	-0.332265	-0.157845	-0.46308
63.9201	0	-0.335325	-0.14739	-0.460785
63.9657	0	-0.29682	-0.1428	-0.45645
64.0112	0	-0.2958	-0.172635	-0.450075
64.0568	0	-0.296055	-0.161415	-0.45237
64.1024	0	-0.298095	-0.13617	-0.45696
64.1479	0	-0.28764	-0.13158	-0.444465
64.1935	0	-0.289425	-0.141525	-0.45441
64.239	0	-0.294525	-0.1326	-0.45084
64.2846	0	-0.29427	-0.134385	-0.45441
64.3302	0	-0.29223	-0.12444	-0.46155
64.3757	0	-0.29376	-0.119595	-0.456705
64.4213	0	-0.2958	-0.11781	-0.46359
64.4668	0	-0.289425	-0.113985	-0.46716
64.5124	0	-0.27948	-0.11526	-0.4641
64.558	0	-0.276675	-0.107355	-0.46665
64.6035	0	-0.274635	-0.095625	-0.46104
64.6491	0	-0.27846	-0.093075	-0.43656
64.6946	0	-0.27795	-0.10506	-0.425595
64.7402	0	-0.245565	-0.108885	-0.41922
64.7858	0	-0.240465	-0.09639	-0.41208
64.8313	0	-0.228735	-0.0867	-0.41208
64.8769	0	-0.232815	-0.086955	-0.41463
64.9224	0	-0.22593	-0.10302	-0.40851
64.968	0	-0.22593	-0.10302	-0.40851
65.0136	0	-0.22593	-0.10302	-0.40851
65.0591	0	-0.22593	-0.10302	-0.40851
65.1047	0	-0.22593	-0.10302	-0.40851
65.1502	0	-0.22593	-0.10302	-0.40851
65.1958	0	-0.22593	-0.10302	-0.40851
65.2414	0	-0.22593	-0.10302	-0.40851
65.2869	0	-0.22593	-0.10302	-0.40851
65.3325	0	-0.22593	-0.10302	-0.40851
65.378	0	-0.22593	-0.10302	-0.40851
65.4236	0	-0.22593	-0.10302	-0.40851
65.4692	0	-0.22593	-0.10302	-0.40851
65.5147	0	-0.22593	-0.10302	-0.40851
65.5603	0	-0.22593	-0.10302	-0.40851
65.6058	0	-0.22593	-0.10302	-0.40851
65.6514	0	-0.22593	-0.10302	-0.40851
65.697	0	-0.22593	-0.10302	-0.40851
65.7425	0	-0.22593	-0.10302	-0.40851
65.7881	0	-0.22593	-0.10302	-0.40851
65.8336	0	-0.22593	-0.10302	-0.40851
65.8792	0	-0.22593	-0.10302	-0.40851
65.9248	0	-0.22593	-0.10302	-0.40851
65.9703	0	-0.22593	-0.10302	-0.40851
66.0159	0	-0.22593	-0.10302	-0.40851
66.0614	0	-0.22593	-0.10302	-0.40851
66.107	0	-0.22593	-0.10302	-0.40851
66.1525	0	-0.22593	-0.10302	-0.40851
66.1981	0	-0.22593	-0.10302	-0.40851
66.2437	0	-0.22593	-0.10302	-0.40851
66.2892	0	-0.22593	-0.10302	-0.40851
66.3348	0	-0.22593	-0.10302	-0.40851
66.3803	0	-0.22593	-0.10302	-0.40851
66.4259	0	-0.22593	-0.10302	-0.40851
66.4715	0	-0.22593	-0.10302	-0.40851
66.517	0	-0.22593	-0.10302	-0.40851
66.5626	0	-0.22593	-0.10302	-0.40851
66.6081	0	-0.22593	-0.10302	-0.40851
66.6537	0	-0.22593	-0.10302	-0.40851
66.6993	0	-0.22593	-0.10302	-0.40851
66.7448	0	-0.22593	-0.10302	-0.40851
66.7904	0	-0.22593	-0.10302	-0.40851
66.8359	0	-0.22593	-0.10302	-0.40851
66.8815	0	-0.22593	-0.10302	-0.40851
66.9271	0	-0.22593	-0.10302	-0.40851
66.9726	0	-0.22593	-0.10302	-0.40851
67.0182	0	-0.22593	-0.10302	-0.40851
67.0637	0	-0.22593	-0.10302	-0.40851
67.1093	0	-0.22593	-0.10302	-0.40851
67.1549	0	-0.22593	-0.10302	-0.40851
67.2004	0	-0.22593	-0.10302	-0.40851
67.246	0	-0.22593	-0.10302	-0.40851
67.2915	0	-0.22593	-0.10302	-0.40851
67.3371	0	-0.22593	-0.10302	-0.40851
67.3827	0	-0.22593	-0.10302	-0.40851
67.4282	0	-0.22593	-0.10302	-0.40851
67.4738	0	-0.22593	-0.10302	-0.40851
67.5193	0	-0.22593	-0.10302	-0.40851
67.5649	0	-0.22593	-0.10302	-0.40851
67.6105	0	-0.22593	-0.10302	-0.40851
67.656	0	-0.22593	-0.10302	-0.40851
67.7016	0	-0.22593	-0.10302	-0.40851
67.7471	0	-0.22593	-0.10302	-0.40851
67.7927	0	-0.22593	-0.10302	-0.40851
67.8383	0	-0.22593	-0.10302	-0.40851
67.8838	0	-0.22593	-0.10302	-0.40851
67.9294	0	-0.22593	-0.10302	-0.40851
67.9749	0	-0.22593	-0.10302	-0.40851
68.0205	0	-0.22593	-0.10302	-0.40851
68.0661	0	-0.22593	-0.10302	-0.40851
68.1116	0	-0.22593	-0.10302	-0.40851
68.1572	0	-0.22593	-0.10302	-0.40851
68.2027	0	-0.22593	-0.10302	-0.40851
68.2483	0	-0.22593	-0.10302	-0.40851
68.2939	0	-0.22593	-0.10302	-0.40851
68.3394	0	-0.22593	-0.10302	-0.40851
